# Supplementary material for: Incarceration and Cancer-Related Outcomes (ICRO) study protocol: using a mixed-methods approach to investigate the role of incarceration on cancer incidence, mortality and quality of care
Source: PubMed Central journal article supplement — BMJ Open. 2021 May 24;11(5):e048863. doi: 10.1136/bmjopen-2021-048863 (PMC8154989; doi:10.1136/bmjopen-2021-048863), 2021-05-24
Supplement: bmjopen-2021-048863.draft_revisions.pdf [file bmjopen-2021-048863.draft_revisions.pdf]

# BMJ Open

BMJ Open is committed to open peer review. As part of this commitment we make the peer review history of every article we publish publicly available.

When an article is published we post the peer reviewers' comments and the authors' responses online. We also post the versions of the paper that were used during peer review. These are the versions that the peer review comments apply to.

The versions of the paper that follow are the versions that were submitted during the peer review process. They are not the versions of record or the final published versions. They should not be cited or distributed as the published version of this manuscript.

BMJ Open is an open access journal and the full, final, typeset and author-corrected version of record of the manuscript is available on our site with no access controls, subscription charges or pay-per-view fees (<http://bmjopen.bmj.com>).

If you have any questions on BMJ Open's open peer review process please email [info.bmjopen@bmj.com](mailto:info.bmjopen@bmj.com)

# BMJ Open

## **Incarceration and Cancer-Related Outcomes (ICRO) Study Protocol: Using a Mixed Methods Approach to Investigate the Role of Incarceration on Cancer Incidence, Mortality, and Quality of Care**

|                               |                                                                                                                                                                                                                                                                                                                                                                                                                                                                                                                                                                                                                                                                                                                                                                                                                                                                                                                                                                                                                                                                                 |
|-------------------------------|---------------------------------------------------------------------------------------------------------------------------------------------------------------------------------------------------------------------------------------------------------------------------------------------------------------------------------------------------------------------------------------------------------------------------------------------------------------------------------------------------------------------------------------------------------------------------------------------------------------------------------------------------------------------------------------------------------------------------------------------------------------------------------------------------------------------------------------------------------------------------------------------------------------------------------------------------------------------------------------------------------------------------------------------------------------------------------|
| Journal:                      | <i>BMJ Open</i>                                                                                                                                                                                                                                                                                                                                                                                                                                                                                                                                                                                                                                                                                                                                                                                                                                                                                                                                                                                                                                                                 |
| Manuscript ID                 | bmjopen-2021-048863                                                                                                                                                                                                                                                                                                                                                                                                                                                                                                                                                                                                                                                                                                                                                                                                                                                                                                                                                                                                                                                             |
| Article Type:                 | Protocol                                                                                                                                                                                                                                                                                                                                                                                                                                                                                                                                                                                                                                                                                                                                                                                                                                                                                                                                                                                                                                                                        |
| Date Submitted by the Author: | 08-Jan-2021                                                                                                                                                                                                                                                                                                                                                                                                                                                                                                                                                                                                                                                                                                                                                                                                                                                                                                                                                                                                                                                                     |
| Complete List of Authors:     | <p>Puglisi, Lisa; Yale School of Medicine, SEICHE Center for Health and Justice, Department of Internal Medicine<br/> Halberstam, Alexandra; Yale University<br/> Aminawung, Jenerius; Yale School of Medicine, SEICHE Center for Health and Justice, Department of Internal Medicine<br/> Gallagher, Colleen; Connecticut Department of Corrections<br/> Gonsalves, Lou; Connecticut Department of Public Health, Connecticut Tumor Registry<br/> Schulman-Green, Dena; New York University, Rory Meyers College of Nursing<br/> Lin, Hsiu-ju; University of Connecticut System; Connecticut Department of Mental Health and Addiction Services<br/> Metha, Rajni; Yale University Yale Cancer Center, Yale Rapid Case Ascertainment<br/> Mun, Sophia ; Yale COPPER<br/> Oladeru, Oluwadamilola; Brigham and Women's Hospital, Harvard Radiology Oncology Program<br/> Wang, Emily; Yale School of Medicine, SEICHE Center for Health and Justice, Department of Internal Medicine<br/> Gross, Cary; Yale School of Medicine, Department of Internal Medicine, Yale COPPER</p> |
| Keywords:                     | EPIDEMIOLOGY, ONCOLOGY, Protocols & guidelines < HEALTH SERVICES ADMINISTRATION & MANAGEMENT, PUBLIC HEALTH, Epidemiology < ONCOLOGY                                                                                                                                                                                                                                                                                                                                                                                                                                                                                                                                                                                                                                                                                                                                                                                                                                                                                                                                            |
|                               |                                                                                                                                                                                                                                                                                                                                                                                                                                                                                                                                                                                                                                                                                                                                                                                                                                                                                                                                                                                                                                                                                 |

SCHOLARONE™  
Manuscripts

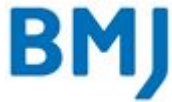

I, the Submitting Author has the right to grant and does grant on behalf of all authors of the Work (as defined in the below author licence), an exclusive licence and/or a non-exclusive licence for contributions from authors who are: i) UK Crown employees; ii) where BMJ has agreed a CC-BY licence shall apply, and/or iii) in accordance with the terms applicable for US Federal Government officers or employees acting as part of their official duties; on a worldwide, perpetual, irrevocable, royalty-free basis to BMJ Publishing Group Ltd ("BMJ") its licensees and where the relevant Journal is co-owned by BMJ to the co-owners of the Journal, to publish the Work in this journal and any other BMJ products and to exploit all rights, as set out in our [licence](#).

The Submitting Author accepts and understands that any supply made under these terms is made by BMJ to the Submitting Author unless you are acting as an employee on behalf of your employer or a postgraduate student of an affiliated institution which is paying any applicable article publishing charge ("APC") for Open Access articles. Where the Submitting Author wishes to make the Work available on an Open Access basis (and intends to pay the relevant APC), the terms of reuse of such Open Access shall be governed by a Creative Commons licence – details of these licences and which [Creative Commons](#) licence will apply to this Work are set out in our licence referred to above.

Other than as permitted in any relevant BMJ Author's Self Archiving Policies, I confirm this Work has not been accepted for publication elsewhere, is not being considered for publication elsewhere and does not duplicate material already published. I confirm all authors consent to publication of this Work and authorise the granting of this licence.

1  
2  
3 **Title:** Incarceration and Cancer-Related Outcomes (ICRO) Study Protocol: Using a Mixed  
4  
5 Methods Approach to Investigate the Role of Incarceration on Cancer Incidence, Mortality, and  
6  
7 Quality of Care  
8  
9

10  
11 Lisa B. Puglisi,<sup>1,2</sup> Alexandra A. Halberstam,<sup>3</sup> Jenerius Aminawung,<sup>1,2</sup> Colleen Gallagher,<sup>4</sup> Lou  
12  
13 Gonsalves,<sup>5</sup> Dena Schulman-Green,<sup>6</sup> Hsiuju Lin,<sup>7,8</sup> Rajni Metha,<sup>9</sup> Sophia Mun,<sup>10</sup> Oluwadamilola  
14  
15 Oladeru,<sup>11</sup> Emily A. Wang,<sup>1, 2</sup> Cary P. Gross.<sup>2, 10</sup>  
16  
17

18  
19  
20 <sup>1</sup> SEICHE Center for Health and Justice, Yale School of Medicine, New Haven, CT, USA  
21

22 <sup>2</sup> Department of Internal Medicine, Yale School of Medicine, New Haven, CT, USA  
23

24 <sup>3</sup> Yale University, New Haven, CT, USA  
25

26 <sup>4</sup> Connecticut Department of Correction, Wethersfield, CT, USA  
27

28 <sup>5</sup> Connecticut Tumor Registry, Connecticut Department of Public Health, Hartford, CT, USA  
29

30 <sup>6</sup> New York University, Rory Meyers College of Nursing, New York, NY, USA  
31

32 <sup>7</sup> University of Connecticut, Department of Social Work, Storrs, CT, USA  
33

34 <sup>8</sup> Connecticut Department of Mental Health and Addiction Services, USA  
35

36 <sup>9</sup> Yale Rapid Case Ascertainment, Yale University Yale Cancer Center, New Haven, CT, USA  
37

38 <sup>10</sup> Yale COPPER, New Haven, CT, USA  
39

40 <sup>11</sup> Brigham and Women's Hospital, Harvard Radiology Oncology Program, Boston, MA, USA  
41  
42  
43

44 **Corresponding author:**

45 Lisa B. Puglisi  
46 300 George Street  
47 Room G05  
48 New Haven, Connecticut, 06511  
49 lisa.puglisi@yale.edu  
50

51 **Word count:** 3935  
52

53 **Key words:** cancer, health equity, prison, incarceration  
54  
55  
56  
57  
58  
59  
60

## ABSTRACT

**Introduction:** Incarceration is associated with decreased cancer screening rates and a higher risk for hospitalization and death from cancer after release from prison. However, there is a paucity of data on the relationship between incarceration and cancer outcomes and quality of care. In the Incarceration and Cancer-Related Outcomes (ICRO) Study, we aim to develop a nuanced understanding of how incarceration affects cancer incidence, mortality, and treatment, and moderates the relationship between socioeconomic status, structural racism, and cancer disparities.

**Methods and analysis:** We will use a sequential explanatory mixed methods study design. We will create the first comprehensive linkage of data from the Connecticut Department of Correction and the statewide Connecticut Tumor Registry. Using the linked dataset, we will examine differences in cancer incidence and stage at diagnosis between individuals currently incarcerated, formerly incarcerated, and never incarcerated in Connecticut from 2005-2016. Among individuals with invasive cancer, we will assess relationships among incarceration, quality of cancer care, and mortality, and will assess the degree to which incarceration status moderates relationships among race, socioeconomic status, quality of cancer care, and cancer mortality. We will use multivariable logistic regression and Cox survival models with interaction terms as appropriate. These results will inform our conduct of in-depth interviews with individuals diagnosed with cancer during or shortly after incarceration regarding their experiences with cancer care in the correctional system and the immediate post-release period. The results of this qualitative work will help contextualize the results of the data linkage.

**Ethics and Dissemination:** The Yale University Institutional Review Board (#2000022899) and the Connecticut Department of Public Health Human Investigations Committee approved this study. We will disseminate study findings through peer-reviewed publications and academic and community presentations. Access to the de-identified quantitative and qualitative datasets will be made available upon review of the request.

**Registration Details:** Not Applicable

## ARTICLE SUMMARY

### Strengths and Limitations of this Study

- We will use a mixed-methods sequential explanatory design to examine cancer incidence, outcomes, and quality of care among individuals currently incarcerated, formerly incarcerated, and never incarcerated in Connecticut from 2005-2016 and will be the first study to explore the relationship between incarceration and racial and socioeconomic disparities in cancer.
- We will devise innovative partnerships among the Connecticut Tumor Registry (CTR), the Connecticut Department of Correction (CDOC) and Yale Cancer Center Rapid Case Ascertainment (RCA) to create a novel administrative data linkage registry.
- Our findings will be based on a single state's correctional system, and Connecticut has unique state Medicaid policies which may limit the applicability of our findings to other states' correctional populations.
- We rely on registry data rather than self-reported measures of race, ethnicity, and socioeconomic status, and attempts to disentangle race from other sociodemographic characteristics may not yield consistent results.

## INTRODUCTION

The United States (U.S.) adult prison population tripled between 1987 and 2015. According to recent data, 2.2 million Americans are incarcerated at any given time,[1] and these individuals are disproportionately racial and ethnic minorities and of lower socioeconomic class.[2] Incarceration is associated with a higher risk of illness and death after release, including from cancer.[3-5] Given the disproportionate impact of mass incarceration on Black and Latinx populations and individuals with lower socioeconomic status, as well as related detrimental health effects, incarceration may also be associated with racial and socioeconomic disparities in cancer outcomes (Figure 1). Past studies documenting the existence of such disparities have focused on assessing the potential influence of biology, health behaviors, bias, or access to high quality care.[6] These analyses, however, have largely failed to measure criminal justice exposure directly, or have done so in limited ways.

There are a number of reasons that having been incarcerated would place individuals at higher risk for developing cancer. In 2016, 30.2% of illness-related deaths in U.S. state prisons were attributed to cancer, making it the leading cause of illness-related deaths in the incarcerated population.[7] Studies suggest that incarcerated individuals are often at least ten years older in physiologic age than chronologic age,[8] and accelerated aging predisposes individuals to chronic and geriatric illnesses, including cancer. Researchers have also noted higher rates of self-reported cancer in incarcerated populations[9,10] and indirectly found that incarceration increases cancer risk factors.[11] Cancer risk factors include smoking, substance use, and infectious disease and are more prevalent in incarcerated people compared with the general population.[12-14] Additionally, individuals with a history of incarceration have higher rates of co-morbidities, including alcohol and substance use disorders and mental health conditions compared with the general population, making treatment management more difficult.[15] Moreover, high levels of stress during incarceration have been described in prison

1  
2  
3 ethnographies,[16,17] and given that cancers are mediated by inflammatory processes, there  
4 may be a higher incidence of cancer in this population.  
5  
6

7         Despite these data, the nature of association between incarceration and cancer  
8 outcomes remains unclear. When considering screening or prompt diagnosis after symptom  
9 onset, incarceration may counterintuitively improve cancer outcomes for minorities and  
10 individuals of low socioeconomic status given constitutionally guaranteed access to healthcare  
11 during incarceration. This hypothesis is informed by the fact that many adults first engage with  
12 the health care system during their incarceration, and as a result, approximately 40% receive  
13 their first diagnosis of a chronic condition while incarcerated.[18] Improved access to healthcare  
14 services, reduced access to illicit drugs and alcohol, and enforced adherence to medications  
15 may improve overall health while incarcerated.  
16  
17

18         Conversely, it is plausible that incarceration is associated with worse cancer  
19 outcomes.[19] While research examining quality of care provided to currently or formerly  
20 incarcerated individuals is limited,[20,21] cost-cutting methods and co-payments may limit  
21 access to cancer care.[22] In one study, researchers noted inadequate pain management  
22 among incarcerated individuals with cancer pain but did not assess cancer treatment.[23]  
23  
24 Another study demonstrated that many individuals do not receive screening during incarceration  
25 despite its availability in prison. For instance, of all individuals held in San Francisco jails, only  
26 41% of women older than 40 reported having a mammogram within two years, and only 31% of  
27 individuals older than 50 reported having a colonoscopy.[24] Incarcerated individuals are also  
28 likely unaware of cancer screening guidelines, considering the high rates of inadequate health  
29 literacy among justice-involved populations.[25]  
30  
31

32         Additionally, when individuals are released from a correctional facility, they frequently  
33 lose any improvements in health and experience worse health outcomes compared with those  
34 never incarcerated. A prior study demonstrated that Medicare beneficiaries recently released  
35 from correctional facilities had higher cancer-related hospitalization rates, along with an  
36  
37  
38  
39  
40  
41  
42  
43  
44  
45  
46  
47  
48  
49  
50  
51  
52  
53  
54  
55  
56  
57  
58  
59  
60



1  
2  
3 increased risk of cancer-related mortality compared with the general population.[26] This result  
4  
5 could be due to stressors related to securing housing, food, and work post-release — tasks  
6  
7 more difficult with a criminal record.[27] These barriers may prevent individuals from obtaining  
8  
9 primary care and health insurance and resuming their cancer-directed treatments.[28,29]  
10

11 Through the ICRO study, we will attempt to fill these knowledge gaps and examine the  
12  
13 impact of incarceration, independent from socioeconomic differences and other confounding  
14  
15 factors, on cancer incidence, quality of care, and mortality and assess the degree to which  
16  
17 incarceration status moderates relationships among race, socioeconomic status, quality of  
18  
19 cancer care, and cancer mortality.  
20  
21  
22  
23

## 24 **METHODS AND ANALYSIS**

### 25 **Study design**

26  
27 We will use a mixed methods sequential explanatory design to investigate the  
28  
29 relationship between incarceration and cancer outcomes (Figure 2). This is a design which  
30  
31 includes two distinct consecutive phases: quantitative followed by qualitative, where the second  
32  
33 phase builds upon the results of the first.[30] Specifically, we will create the first comprehensive,  
34  
35 population-based linkage of a statewide cancer registry, the Connecticut Tumor Registry (CTR),  
36  
37 which includes mortality data, and the movement database of the Connecticut Department of  
38  
39 Correction (CDOC). Novel data linkages are needed to study the relationship between  
40  
41 incarceration and cancer outcomes in part because incarceration status is not addressed by  
42  
43 large, national population-based surveys such as the Behavioral Risk Factor Surveillance  
44  
45 System or the National Health Interview Survey, or by the national cancer registration programs  
46  
47 (the National Cancer Institute's Surveillance, Epidemiology, and End Results (SEER) program  
48  
49 and the Centers for Disease Control and Prevention's National Program of Cancer Registries  
50  
51 (NPCR)).  
52  
53  
54  
55  
56  
57  
58  
59  
60

1  
2  
3 We will link these databases based on probabilistic matching of individual cases using  
4 name, date of birth, sex and social security number to ensure accuracy. We will then assemble  
5 retrospective cohorts with members who are currently, formerly, or were never incarcerated in  
6 Connecticut between 2005-2016. Incarceration will be defined as having a history of being  
7 admitted to CDOC, whether remanded (admitted to custody, but not yet sentenced) or  
8 incarcerated (sentenced to either jail or prison). The “never incarcerated” cohort will be defined  
9 as individuals who did not appear in CDOC movement files between 2005-2016. Once we have  
10 identified these cohorts, we will extract their linked data. We will not track individuals who move  
11 out of Connecticut during the study period.  
12  
13  
14  
15  
16  
17  
18  
19  
20  
21

22 Population-level epidemiologic data from our linkage will provide an inroad into  
23 understanding the impact of incarceration on cancer outcomes and treatment quality, and into  
24 how mass incarceration may contribute to racial and socioeconomic cancer disparities. Yet, only  
25 direct narratives from individuals diagnosed with cancer can provide an in-depth understanding  
26 of individual and health system factors associated with quality of care during and immediately  
27 after release.[31] Within our sequential explanatory design, we will use quantitative data from  
28 our data linkage to design interview guides that we will use to conduct one-on-one interviews  
29 with unique individuals who were released from CDOC within the prior month. This qualitative  
30 component will function to refine and explain quantitative results.  
31  
32  
33  
34  
35  
36  
37  
38  
39  
40

41 Connecticut, a state with the nation’s second highest income gap,[32] and wide racial  
42 disparities in incarceration,[33] is an ideal setting to study the relationship between  
43 incarceration, cancer outcomes, and racial and socioeconomic disparities. The CTR is the  
44 oldest cancer registry in the country and is highly regarded for its quality and long-standing track  
45 record of productive academic collaboration. The CDOC also has a combined criminal justice  
46 system where jails and prisons are under the authority of a single agency, thus allowing for  
47 easier data linkages.  
48  
49  
50  
51  
52  
53  
54  
55  
56  
57  
58  
59  
60

## Data Sets and Linkage

Descriptions of the data sets for linkage in the ICRO study are presented in Table 1.

**Table 1: Data sets for Linkage**

| Database                                    | Description                                                                                                                                                                                                                                                                                                                                                                                                                                                                                                                                                                                                                                                                                                                                                                                                                                                                                             | Key Variables                                                                                                                                                                                                                                                  |
|---------------------------------------------|---------------------------------------------------------------------------------------------------------------------------------------------------------------------------------------------------------------------------------------------------------------------------------------------------------------------------------------------------------------------------------------------------------------------------------------------------------------------------------------------------------------------------------------------------------------------------------------------------------------------------------------------------------------------------------------------------------------------------------------------------------------------------------------------------------------------------------------------------------------------------------------------------------|----------------------------------------------------------------------------------------------------------------------------------------------------------------------------------------------------------------------------------------------------------------|
| The Connecticut Tumor Registry (CTR)        | The CTR is a population-based resource for examining cancer patterns in Connecticut which includes all reported cancers diagnosed in Connecticut residents since 1935, as well as follow-up, treatment, and survival data. All licensed medical providers, as well as hospitals and private pathology laboratories in the state, are required by law to report cancer cases to the registry, including those that care for incarcerated individuals. The CTR is the oldest population-based cancer registry in the country. Rigorous quality control procedures, stringent requirements in case reporting, and reciprocal cancer reporting agreements with neighboring states allow the registry to identify cancers among all Connecticut residents even when diagnosed or treated in other states. CTR data have been used widely in research into cancer etiology, epidemiology and quality of care. | Name*, date of birth*, social security number*, age, race/ethnicity, marital status, sex, residential census tract at time of diagnosis, insurance at time of diagnosis, dates of diagnosis and treatment, vital status, date of last contact, cause of death. |
| Connecticut Department of Correction (CDOC) | The CDOC has an annual population of approximately 15,000 individuals, with disproportionate incarceration of racial and ethnic minorities (demographically similar to rates of incarceration nationwide). CDOC also has a combined criminal justice system, where jails and prisons are under the authority of a single agency. CDOC supports research aimed at improving the health of, and reducing recidivism for, justice involved individuals and has partnered with many academic institutions on federally funded grants.[34]                                                                                                                                                                                                                                                                                                                                                                   | Dates of incarceration, date of release (if applicable), inmate name*, any known alias(es)*, inmate number, place of incarceration, date of birth*, race, social security number*, sex, and place of birth.                                                    |

\* These variables were used in the record linkage only and were not part of the analytic dataset.

The Yale Cancer Center's Rapid Case Ascertainment (RCA) Shared Resource, which was developed in 1986 in response to a Connecticut Hospital Association request to establish a single entity that would be responsible for all aspects of population-based cancer epidemiology studies, will abstract medical records. RCA staff function as agents of the Connecticut Tumor Registry (CTR) and can conduct record reviews to address information missing from the CTR. RCA can thus abstract patient-specific treatment data including diagnostic, imaging and

1  
2  
3 pathology reports, and clinical notes in each hospital's electronic medical record or paper  
4 charts.  
5

6  
7 Using data collected between 2005 and 2016, we will use Match\*Pro, a probabilistic  
8 record linkage software program available from the National Cancer Institute,[35] to link CDOC  
9 movement files to CTR data using first name, last name, sex, date of birth, and social security  
10 number. The linkage methodology is based upon the Fellegi and Sunter model.[36] We will  
11 extract data for matched cases on cancer diagnosis (primary site, date, histology), stage of  
12 disease, vital status, date of last contact, and cause of death (if deceased) from the CTR. In  
13 previous studies, CDOC data has been linked to state health insurance data using sophisticated  
14 probabilistic and deterministic algorithms with reported sensitivity and positive predictive values  
15 in the mid 90 percent range.  
16  
17  
18  
19  
20  
21  
22  
23  
24  
25  
26  
27

## 28 **Patient and Public Involvement**

29  
30 Our multidisciplinary study team consists of health services researchers, oncologists,  
31 primary care doctors, statisticians, and individuals with a history of incarceration. For the  
32 qualitative component, we will work with individuals with a history of incarceration to design an  
33 interview guide, conduct qualitative in-depth interviews, and iteratively code and identify themes  
34 related to quality of cancer treatment. Community healthcare workers, who have a history of  
35 incarceration and are experienced in conducting research with vulnerable populations, will be  
36 trained to conduct the interviews. We will convene a Study Advisory Board which consists of  
37 correctional providers, oncologists, policymakers, individuals with cancer and a history of  
38 incarceration, and community advocates. The board will meet quarterly to provide input on  
39 research progress and findings.  
40  
41  
42  
43  
44  
45  
46  
47  
48  
49  
50  
51  
52  
53

## 54 **Planned analyses**

55  
56 Cancer incidence and mortality analyses  
57  
58  
59  
60

1  
2  
3 We will use the linked dataset to compare new cancer diagnoses, cancer incidence rate,  
4 quality of cancer care, and cancer-related deaths among Connecticut residents currently,  
5 formerly, and never incarcerated. First, for the cancer incidence rate among individuals currently  
6 incarcerated, we will divide the number of individuals with new primary cancers diagnosed  
7 between the date of admission to custody in 2005 and December 31, 2016, by the person-years  
8 at risk of incident cancer, defined as the difference between the date of admission to custody in  
9 2005 and December 31, 2016, death, diagnosis of primary cancer, or release (whichever  
10 occurred first). If an individual was released and re-incarcerated, the period of time between the  
11 date of re-admission, and their death, diagnosis of cancer, or December 31, 2014 will be added  
12 to their person-time “incarcerated.” Second, for the released group, we will use CDOC data to  
13 estimate the number of formerly incarcerated individuals living in Connecticut in each age/sex  
14 strata. In each stratum, we will calculate the number of person-years as the population at risk  
15 and employ CTR data to calculate age-adjusted incidence and mortality. Finally, for those never  
16 incarcerated between 2005 and 2016, we will divide number of new primary cancers diagnosed  
17 by the person-years at risk of incident cancer. The “never incarcerated” group will be estimated  
18 by subtracting the currently and formerly incarcerated individuals from the Connecticut  
19 population data by age/sex group as obtained from Census data.  
20  
21  
22  
23  
24  
25  
26  
27  
28  
29  
30  
31  
32  
33  
34  
35  
36  
37  
38

39 To measure the associations among incarceration, cancer incidence and mortality, we  
40 will estimate population attribute risk from incarceration with the equation  $p(ec) \times (OR-1) / OR$ ,  
41 where  $p(ec)$  is the proportion exposed (i.e., experience with incarceration) among  
42 individuals.[28] We will use two tailed chi-square tests to compare cancer incidence and  
43 mortality rates among currently incarcerated, ever incarcerated, and never incarcerated  
44 groups. To detect a difference in incidence and mortality rate equivalent to a medium effect size  
45 (OR=3.47, or Cohen d=0.5) or a small effect size (OR=1.68, or Cohen=0.2), with  $\alpha=0.05$   
46 and power=80%, each group will need N=107 or N=964. Our large sample size will grant more  
47 than sufficient statistical power to detect clinical meaningful effect size.  
48  
49  
50  
51  
52  
53  
54  
55  
56  
57  
58  
59  
60

## Incarceration and Mortality

To assess the relationship between incarceration and cancer mortality among Connecticut residents diagnosed with cancer during 2005-2016, we will use Cox regression models to evaluate the independent association of incarceration states and cancer mortality. We will calculate descriptive statistics for each independent variable, stratified by incarceration status. The extended Cox model will use binary incarcerated status as the time-varying covariate as well as other time-fixed covariates. Time-fixed covariates of interest include age, sex, race/ethnicity (categorized into Hispanic, non-Hispanic white, black, and other racial groups), marital status (categorized into single, separated, divorced, widowed, and unmarried partner), insurance at the time of diagnosis (no insurance, insurance, and other if unknown), mortality, incarceration history prior to the time of diagnosis, and socioeconomic states. We will categorize poverty into 4 levels using the Census Tract Poverty Indicator. We will use a Cox model with time-dependent incarcerated status covariate will to assess the association between incarceration status and risk of cancer mortality. We will also evaluate the association between place of diagnosis (i.e., during incarceration, post-incarceration within a defined time frame of release, and never incarcerated) and cancer incidence and risk of mortality. Finally, we will include clinical factors such as late stage of diagnosis to assess whether the relation between incarceration and cancer mortality is mediated by diagnosis stage or treatment timeliness.

To estimate an adequate sample size for this survival analyses, we used Singer and Willett's sample size table,[37] which provides minimum total sample sizes necessary to achieve a reasonable power level based on the ratio of median lifetimes ( $R=m1/m2$ ) and length of follow-up ( $F=T/A$ , where  $T$ =total length of follow-up, and  $A=m1/m2$ ). A previous study found median survival times of 21 months for incarcerated cases and 54 months for a matched SEER cohort, which corresponds to a large effect size of  $R=2.57$ . [10] When median lifespan in one group is twice as long as median lifespan in the other, the study will have an 80% chance of detecting this difference using only  $N=100-200$  cases. With a more conservative estimate,

1  
2  
3 assuming a minimum detectable effect size of  $R=1.5-1.75$ , a significance level of 0.05, and 80%  
4 of power, we will need an  $N=122$  or  $N=296$ .  
5  
6  
7  
8

#### 9 Quality of cancer care analyses 10

11 We will ascertain quality of care using two approaches. First, we will assess timeliness of care,  
12 defined as the system's capacity to provide care quickly after a need is recognized.[38] Guidelines and  
13 prior empiric studies have defined treatment delay as the temporal period between diagnosis and  
14 definitive cancer treatment and examined the significance of treatment delay for many common cancer  
15 types.[39-41] We will employ a common definition of delay as  $>30$  days between diagnosis and initial  
16 treatment.[42] Second, we will assess adherence to care processes recommended for each major  
17 cancer type. For instance, we will assess the use of curative cancer therapy among men with  
18 intermediate or high grade localized prostate cancer.[43]  
19  
20  
21  
22  
23  
24  
25  
26  
27

28 Yale RCA staff will conduct a medical chart review to both validate CTR data and abstract  
29 additional information about quality and timeliness of care, including receipt of cancer directed therapy  
30 for non-metastatic disease, dates of surgery, radiation therapy, and clinicopathologic tests for each  
31 diagnosis. We will use a rigorous, multi-step approach to train abstractors and assure quality of  
32 medical record abstraction.[44] To measure the association between incarceration and quality of  
33 cancer care, we will use descriptive statistics to characterize receipt of care for individuals based on  
34 their incarceration status at the time of diagnosis and use chi-square tests to compare. We will use  
35 logistic regression to assess the association between incarceration and treatment delay (yes/no) and  
36 treatment concordant-care (yes/no). We will adjust for individual characteristics, including age, sex,  
37 race, ethnicity, marital status, insurance at time of diagnosis, and socioeconomic status (percent of  
38 families living below the poverty level derived from individual census tract.) Poverty, individual  
39 race/ethnicity, marital status, and insurance will be grouped as noted above. We will also examine  
40 additional variables including place of diagnosis and sex as it is associated with mortality and quality of  
41 care. To address sex as a biologic variable, we will only examine cancers that can affect women,  
42  
43  
44  
45  
46  
47  
48  
49  
50  
51  
52  
53  
54  
55  
56  
57  
58  
59  
60

1  
2  
3 despite lower rates of women being incarcerated (for example we will exclude cancers that only affect  
4 male reproductive organs). Sex can be an important source of variation in detection, quality of care,  
5 and mortality both because correctional facilities that care for women and the challenges women face  
6 upon release are unique.[45]  
7  
8  
9

10  
11 To estimate the number of participants needed for multivariate regression models, we used a  
12 logistic regression sample size estimation method.[46] We performed calculations with the following  
13 assumptions: 1) the ability to detect an odds ratio of 1.5 (equivalent to a small effect size);[47] 2) two-  
14 sided 0.05 significance level; 3) adjustment of R-squared of 0.4 (i.e., R-squared achieved when the  
15 independent variable of interest is regressed on the other covariates in the regression). Given such  
16 assumptions, we will need to review medical records from 308 patients from the entire study sample to  
17 achieve 80% statistical power. Breast cancer will likely be the smallest number of cancers we identify  
18 given the population of incarcerated individuals. We will be able to look at breast cancer outcomes and  
19 detect a minimum of small to medium effect size of OR=2.0 if there are at least 86 breast cancers  
20 diagnosed in CDOC (assuming 80% statistical power, two-sided test with significance level of  
21 0.05).[48]  
22  
23  
24  
25  
26  
27  
28  
29  
30  
31  
32  
33  
34  
35  
36

### 37 Incarceration and cancer disparities analysis

38  
39 To assess how incarceration status moderates the relation between race and ethnicity (as a  
40 socially, not biologically related variable), socioeconomic status, and quality of cancer care and cancer  
41 mortality, we will measure black-white and socioeconomic disparities in cancer treatment and mortality  
42 before and after adjusting for incarceration status in a multivariable model. The difference in the race  
43 parameter estimate before versus after adjusting for incarceration status will be reported to estimate  
44 the degree to which incarceration mediates the relation between race and ethnicity and cancer  
45 outcomes. We will also measure the high and low socioeconomic disparity and statistically test  
46 whether exposure to incarceration moderates observed associations. In addition to the overall cancer  
47 model, we will analyze each primary cancer diagnosis separately when sample size permits.  
48  
49  
50  
51  
52  
53  
54  
55  
56  
57  
58  
59  
60



### Qualitative investigation of factors associated with cancer care

We will use findings from our quantitative assessments to select cancer types and stages that may be particularly vulnerable to poor quality care among previously incarcerated individuals and to inform the interview guide. Eligible participants must have been released from CDOC within one month and diagnosed with cancer. We will use a purposeful sampling strategy to capture diverse perspectives from key groups of interest (gender, race/ethnicity, disease status).[49] Multi-pronged recruitment will include direct engagement at a primary care clinic for individuals with a history of incarceration, participant word of mouth, and referral from the CDOC, and direct referrals from the community health workers. Participants will receive a \$30 gift card for participation. We will over-sample women to more fully characterize the experience of cancer care for people in the women's facility and expect to interview close to 20. Two members of our research team—one with a history of incarceration who will be trained in qualitative interviewing—will lead semi-structured interviews using a standardized interview guide that will include open-ended questions to elucidate how correctional institutions facilitated or constrained management of cancer. For instance, for those who were diagnosed with cancer in prison, sample questions include: “What was it like to be diagnosed with cancer in prison?”, “What made it easy or hard to manage your cancer in prison?”, or “What makes it easy or hard to manage cancer now that you have been released?” We will design the interview guide in partnership with the Study Advisory Board. Interviews will be audio-recorded, professionally transcribed, and reviewed for accuracy.

Three members of our research team will meet regularly to analyze interviews.[50] We will initially review five transcripts to develop a preliminary coding structure through inductive coding. This strategy employs an interpretive description approach to qualitative analysis, allowing themes to emerge inductively from participants rather than from researcher preconceptions.[51,52] Code keys will be shared with the full research team and advisory board for feedback periodically. A fourth member of our team will review these transcripts and the

1  
2  
3 preliminary coding structure to assess comprehensiveness and properties of emerging codes.  
4  
5 After developing a preliminary code structure, we will code the first five transcripts  
6  
7 independently, meeting weekly to negotiate consensus and refine our code structure using  
8  
9 constant comparative analysis.[53] This iterative process will allow us to refine to our code  
10  
11 structure, eliminating or consolidating codes where needed[54] until we reach thematic  
12  
13 saturation. We will maintain a thorough audit trail of coding decisions. We will then  
14  
15 systematically apply the final codes to all transcripts. We will use qualitative analysis software  
16  
17 (ATLAS.ti 8.0) to facilitate data organization and analysis.  
18  
19  
20  
21

22 A timeline of the ICRO study is presented in figure 3.  
23  
24  
25

## 26 **ETHICS AND DISSEMINATION**

27  
28 The Yale University Institutional Review Board (#2000022899) approved the entirety of  
29  
30 this study and the Connecticut Department of Public Health Institutional Review Board Human  
31  
32 Investigations Committee approved the quantitative data matching portion of this study. We will  
33  
34 disseminate study findings through peer-reviewed publications and academic and community  
35  
36 presentations. The access to the de-identified data set and qualitative interview guides will be  
37  
38 made available upon review of the request.  
39  
40  
41  
42

## 43 **DISCUSSION**

44  
45 Our ICRO study will create the first comprehensive linkage of a statewide tumor registry  
46  
47 that includes vital statistics, and correctional system data, integrated with interviews of  
48  
49 individuals with cancer. The study will enable us to develop a nuanced understanding of how  
50  
51 incarceration affects cancer incidence, mortality, treatment, and relates to observed racial and  
52  
53 socioeconomic cancer disparities. We anticipate that this state-level study will provide  
54  
55  
56  
57  
58  
59  
60

1  
2  
3 knowledge to identify and develop ways to improve cancer care in correctional settings as well  
4 as in the community for people just released from correctional facilities.  
5  
6

7           There are several methodological limitations to note. First, accurately matching  
8 individuals across different data sources is an important challenge for any study involving the  
9 creation of a novel, linked data set. Past linkage studies in Connecticut have had 90% success  
10 rate in linking data across participants. Second, sample size of those incarcerated while  
11 diagnosed with cancer may be small. We have conducted sample size calculations, and even  
12 among the most prevalent cancers among women (for example, breast cancer), we estimate  
13 sufficient sample size to detect meaningful differences between incarceration exposure and  
14 treatment quality. However, for cancers where sample size is small, especially among those  
15 diagnosed while incarcerated, we may create a combined variable, “history of incarceration,” to  
16 explore differences between those with and without a history of incarceration. Third, the CTR  
17 data, although highly reliable in identifying incident cancer diagnoses, may occasionally lack  
18 details regarding treatment timeliness and receipt of therapy beyond the peri-diagnosis period.  
19 For this reason, we will partner with the Yale Cancer Center RCA program, enabling our team,  
20 to receive detailed cancer treatment information abstracted from hospital medical records.  
21  
22 Fourth, our measure of race and ethnicity from the CTR is not self-reported and is derived from  
23 the medical record or health care provider/system, and we will derive measure socioeconomic  
24 status from census tract average poverty level. Self-reported race and ethnicity and individual  
25 measures of socioeconomic status would be more accurate reflections of race/ethnicity and  
26 socioeconomic status, but these are limitations from any study using registry data to examine  
27 racial, ethnic, and socioeconomic disparities. Fifth, attempts to disentangle race/ethnicity from  
28 other sociodemographic characteristics do not always yield consistent results. In some models,  
29 socioeconomic status accounts for most of the cancer disparities between whites and non-  
30 whites,[55] while other studies have found the association between socioeconomic status and  
31 racial and ethnic disparities is attenuated but not completely explained.[56] For the ICRO study,  
32  
33  
34  
35  
36  
37  
38  
39  
40  
41  
42  
43  
44  
45  
46  
47  
48  
49  
50  
51  
52  
53  
54  
55  
56  
57  
58  
59  
60

1  
2  
3 which would be the first study to explore the relationship between incarceration and racial/ethnic  
4 and socioeconomic cancer disparities, we will examine these characteristics separately. Sixth,  
5 our interviewees will have been released from a single state's correctional system. This means  
6 our findings may not be transferable to all correctional settings. Similarly, given uniquely  
7 stabilizing CDOC and state Medicaid policies, many individuals are released in Connecticut with  
8 health insurance and are more apt to engage in care following release, again limiting the  
9 applicability of the ICRO study to other correctional populations.  
10  
11  
12  
13  
14  
15  
16  
17  
18

19 **AUTHOR CONTRIBUTIONS:** Lisa B. Puglisi, Writing-Original Draft, Investigation, Resources,  
20 Alexandra A. Halberstam, Writing- Original Draft, Jenerius Aminawung, Methodology,  
21 Validation, Data Curation, Writing- Original Draft, Project Administration, Colleen Gallagher,  
22 Conceptualization, Investigation, Lou Gonsalves, Software, Formal Analysis, Writing- Original  
23 Draft Dena Schulman-Green, Writing- Original Draft, Methodology, Investigation, Hsiuju Lin,  
24 Software, Validation, Methodology. Formal Analysis, Data Curation, Rajni Metha, Investigation,  
25 Writing- Original Draft, Sophia Mun, Project Administration, Writing- Original Draft, Visualization,  
26 Oluwadamilola Oladeru, Methodology. Writing- Original Draft, Emily A. Wang,  
27 Conceptualization, Methodology, Writing-Original Draft, Supervision. Cary P. Gross,  
28 Conceptualization, Methodology, Writing- Original Draft, Supervision  
29

30 **COMPETING INTERESTS STATEMENT:** All authors report no competing interests  
31

32 **FUNDING STATEMENT:** This work was supported by National Institutes of Health grant  
33 number 1R01CA230444-01. The Connecticut Tumor Registry is supported by federal funds  
34 from the National Cancer Institute, National Institutes of Health, Department of Health and  
35 Human Services, under Contract No. HHSN261201800002I.  
36  
37  
38  
39  
40  
41  
42  
43  
44  
45  
46  
47  
48  
49  
50  
51  
52  
53  
54  
55  
56  
57  
58  
59  
60

## REFERENCES

1. Kaeble D, Glaze L, Tsoutis A, et al. Correctional Populations in the United States, 2014. Correctional Populations in the United States Series. Washington, DC: US Department of Justice, Office of Justice Programs, Bureau of Justice Statistics, 2015.
2. Carson E. Prisoners in 2014. Washington, DC: US Department of Justice, Office of Justice Programs, Bureau of Justice Statistics, 2015.
3. Kouyoumdjian FG, Pivnick L, Mclsaac KE, et al. Cancer prevalence, incidence and mortality in people who experience incarceration in Ontario, Canada: A population-based retrospective cohort study. *PLOS ONE* 2017;12(2):e0171131. doi: 10.1371/journal.pone.0171131
4. Binswanger IA, Stern MF, Deyo RA, et al. Release from Prison — A High Risk of Death for Former Inmates. *New England Journal of Medicine* 2007;356(2):157-65. doi: 10.1056/NEJMs064115
5. Spaulding AC, Seals RM, McCallum VA, et al. Prisoner Survival Inside and Outside of the Institution: Implications for Health-Care Planning. *American Journal of Epidemiology* 2011;173(5):479-87. doi: 10.1093/aje/kwq422
6. Viswanath K, Emmons KM. Message Effects and Social Determinants of Health: Its Application to Cancer Disparities. *Journal of Communication* 2006;56(s1):S238-S64. doi: <https://doi.org/10.1111/j.1460-2466.2006.00292.x>
7. Carson E, Cowhig MP. Mortality in State and Federal Prisons, 2001-2016 – Statistical Tables. Washington, DC: US Department of Justice, Office of Justice Programs, Bureau of Justice Statistics, 2020.
8. Greene M, Ahalt C, Stijacic-Cenzer I, et al. Older adults in jail: high rates and early onset of geriatric conditions. *Health & Justice* 2018;6(1):3. doi: 10.1186/s40352-018-0062-9
9. Binswanger IA, Krueger PM, Steiner JF. Prevalence of chronic medical conditions among jail and prison inmates in the USA compared with the general population. *J Epidemiol Community Health* 2009;63(11):912-9. doi: 10.1136/jech.2009.090662 [published Online First: 2009/08/04]
10. Mathew P, Elting L, Cooksley C, et al. Cancer in an incarcerated population. *Cancer* 2005;104(10):2197-204. doi: <https://doi.org/10.1002/cncr.21468>
11. Kouyoumdjian FG, Andreev EM, Borschmann R, et al. Do people who experience incarceration age more quickly? Exploratory analyses using retrospective cohort data on mortality from Ontario, Canada. *PLOS ONE* 2017;12(4):e0175837. doi: 10.1371/journal.pone.0175837
12. Cropsey K, Eldridge GD, Ladner T. Smoking among female prisoners: An ignored public health epidemic. *Addictive Behaviors* 2004;29(2):425-31. doi: <https://doi.org/10.1016/j.addbeh.2003.08.014>
13. Peters RH, Greenbaum PE, Edens JF, et al. Prevalence of DSM-IV Substance Abuse and Dependence Disorders Among Prison Inmates. *The American Journal of Drug and Alcohol Abuse* 1998;24(4):573-87. doi: 10.3109/00952999809019608
14. Weinbaum CM, Sabin KM, Santibanez SS. Hepatitis B, hepatitis C, and HIV in correctional populations: a review of epidemiology and prevention. *AIDS* 2005;19
15. Fazel S, Baillargeon J. The health of prisoners. *Lancet* 2011;377(9769):956-65. doi: 10.1016/s0140-6736(10)61053-7 [published Online First: 2010/11/26]
16. Sykes GM. *The Society of Captives: A Study of a Maximum Security Prison*. Princeton, NJ: Princeton University Press 1958.
17. Zamble E. Behavior and Adaptation in Long-Term Prison Inmates: Descriptive Longitudinal Results. *Criminal Justice and Behavior* 1992;19(4):409-25. doi: 10.1177/0093854892019004005

18. Wang EA, Hong CS, Shavit S, et al. Engaging Individuals Recently Released From Prison Into Primary Care: A Randomized Trial. *American Journal of Public Health* 2012;102(9):e22-e29. doi: 10.2105/AJPH.2012.300894
19. Wildeman C, Wang EA. Mass incarceration, public health, and widening inequality in the USA. *Lancet* 2017;389(10077):1464-74. doi: 10.1016/s0140-6736(17)30259-3 [published Online First: 2017/04/14]
20. Davies EA, Sehgal A, Linklater KM, et al. Cancer in the London prison population, 1986–2005. *Journal of Public Health* 2010;32(4):526-31. doi: 10.1093/pubmed/fdq009
21. Magee CG, Hult JR, Turalba R, et al. Preventive care for women in prison: a qualitative community health assessment of the Papanicolaou test and follow-up treatment at a California state women's prison. *Am J Public Health* 2005;95(10):1712-7. doi: 10.2105/ajph.2005.063677 [published Online First: 2005/09/28]
22. Awofeso N. Prisoner healthcare co-payment policy. *Applied Health Economics and Health Policy* 2005;4(3):159-64. doi: 10.2165/00148365-200504030-00004
23. Lin JT, Mathew P. Cancer Pain Management in Prisons: A Survey of Primary Care Practitioners and Inmates. *Journal of Pain and Symptom Management* 2005;29(5):466-73. doi: 10.1016/j.jpainsymman.2004.08.015
24. Binswanger IA, White MC, Pérez-Stable EJ, et al. Cancer Screening Among Jail Inmates: Frequency, Knowledge, and Willingness. *American Journal of Public Health* 2005;95(10):1781-87. doi: 10.2105/AJPH.2004.052498
25. Hadden KB, Puglisi L, Prince L, et al. Health Literacy Among a Formerly Incarcerated Population Using Data from the Transitions Clinic Network. *J Urban Health* 2018;95(4):547-55. doi: 10.1007/s11524-018-0276-0 [published Online First: 2018/06/27]
26. Wang EA, Wang Y, Krumholz HM. A high risk of hospitalization following release from correctional facilities in Medicare beneficiaries: a retrospective matched cohort study, 2002 to 2010. *JAMA Intern Med* 2013;173(17):1621-8. doi: 10.1001/jamainternmed.2013.9008 [published Online First: 2013/07/24]
27. Western B. Punishment and Inequality in America: Russell Sage Foundation 2006.
28. Rothman KJ, Greenland S, Lash TL. Modern Epidemiology: Wolters Kluwer Health/Lippincott Williams & Wilkins 2008.
29. Markman M. Care of the incarcerated cancer patient. *Current Oncology Reports* 2007;9(2):81-82.
30. Creswell JW, Plano Clark VL, Gutmann ML, et al. Advanced mixed methods research designs. In: Tashakkori A, Teddlie C, Teddlie CB, eds. Handbook of Mixed Methods in Social & Behavioral Research. Thousand Oaks, CA: SAGE Publications 2003:209–40.
31. Thomas EH, Wang EA, Curry LA, et al. Patients' experiences managing cardiovascular disease and risk factors in prison. *Health & Justice* 2016;4(1):4. doi: 10.1186/s40352-016-0035-9
32. Guzman GG. Household Income: 2019. American Community Survey Briefs. Washington DC: US Department of Commerce: US Census Bureau, 2020.
33. The Sentencing Project. The Facts: State by State Data. Washington, DC2020 [Available from: <https://www.sentencingproject.org/the-facts/#rankings>].
35. Match\*Pro Software [program]. 1.6.2 version. Rockville, MD: National Cancer Institute: Division of Cancer Control and Population Sciences: Surveillance Research Program, 2020.
36. Fellegi IP, Sunter AB. A Theory for Record Linkage. *Journal of the American Statistical Association* 1969;64(328):1183-210. doi: 10.1080/01621459.1969.10501049
37. Singer JD, Willett JB. Modeling the days of our lives: Using survival analysis when designing and analyzing longitudinal studies of duration and the timing of events. *Psychological Bulletin* 1991;110(2):268-90. doi: 10.1037/0033-2909.110.2.268

- 1
- 2
- 3 38. Agency for Healthcare Research and Quality. 2007 National Healthcare Quality Report.  
4 Rockville, MD: U.S. Department of Health and Human Services, Agency for Healthcare  
5 Research and Quality, 2008.
- 6 39. Huff L, Chang C, Thomas J, et al. Defining an acceptable period of time from melanoma  
7 biopsy to excision. *Dermatology Reports* 2012;4 doi: 10.4081/dr.2012.e2
- 8 40. Bardell T, Belliveau P, Kong W, et al. Waiting times for cancer surgery in Ontario: 1984-  
9 2000. *Clin Oncol (R Coll Radiol)* 2006;18(5):401-9. doi: 10.1016/j.clon.2006.02.012  
10 [published Online First: 2006/07/05]
- 11 41. Bilimoria K, Ko C, Tomlinson J, et al. Wait Times for Cancer Surgery in the United States.  
12 *Annals of surgery* 2011;253:779-85. doi: 10.1097/SLA.0b013e318211cc0f
- 13 42. Hanna TP, King WD, Thibodeau S, et al. Mortality due to cancer treatment delay: systematic  
14 review and meta-analysis. *BMJ* 2020;371:m4087. doi: 10.1136/bmj.m4087
- 15 43. Yang DD, Mahal BA, Muralidhar V, et al. Receipt of definitive therapy in elderly patients with  
16 unfavorable-risk prostate cancer. *Cancer* 2017;123(24):4832-40. doi:  
17 10.1002/cncr.30948 [published Online First: 2017/08/24]
- 18 44. Reisch LM, Fosse JS, Beverly K, et al. Training, Quality Assurance, and Assessment of  
19 Medical Record Abstraction in a Multisite Study. *American Journal of Epidemiology*  
20 2003;157(6):546-51. doi: 10.1093/aje/kwg016
- 21 45. Bronson J, Sufrin C. Pregnant Women in Prison and Jail Don't Count: Data Gaps on  
22 Maternal Health and Incarceration. *Public Health Rep* 2019;134(1\_suppl):57s-62s. doi:  
23 10.1177/0033354918812088 [published Online First: 2019/05/07]
- 24 46. Hsieh FY, Bloch DA, Larsen MD. A simple method of sample size calculation for linear and  
25 logistic regression. *Statistics in Medicine* 1998;17(14):1623-34. doi:  
26 [https://doi.org/10.1002/\(SICI\)1097-0258\(19980730\)17:14<1623::AID-SIM871>3.0.CO;2-](https://doi.org/10.1002/(SICI)1097-0258(19980730)17:14<1623::AID-SIM871>3.0.CO;2-S)  
27 [S](https://doi.org/10.1002/(SICI)1097-0258(19980730)17:14<1623::AID-SIM871>3.0.CO;2-S)
- 28 47. Cohen J. Statistical Power Analysis. *Current Directions in Psychological Science*  
29 1992;1(3):98-101. doi: 10.1111/1467-8721.ep10768783
- 30 48. Hsieh FY. Sample size tables for logistic regression. *Statistics in Medicine* 1989;8(7):795-  
31 802. doi: <https://doi.org/10.1002/sim.4780080704>
- 32 49. Sandelowski M. Sample size in qualitative research. *Research in Nursing & Health*  
33 1995;18(2):179-83. doi: <https://doi.org/10.1002/nur.4770180211>
- 34 50. Curry LA, O'Cathain A, Clark VLP, et al. The Role of Group Dynamics in Mixed Methods  
35 Health Sciences Research Teams. *Journal of Mixed Methods Research* 2011;6(1):5-20.  
36 doi: 10.1177/1558689811416941
- 37 51. Corbin JM, Strauss A. Grounded theory research: Procedures, canons, and evaluative  
38 criteria. *Qualitative Sociology* 1990;13(1):3-21. doi: 10.1007/BF00988593
- 39 52. Glaser BG, Strauss AL. The Discovery of Grounded Theory: Strategies for Qualitative  
40 Research. Chicago, IL: Aldine de Gruyter 1967.
- 41 53. Bradley EH, Curry LA, Devers KJ. Qualitative data analysis for health services research:  
42 developing taxonomy, themes, and theory. *Health Serv Res* 2007;42(4):1758-72. doi:  
43 10.1111/j.1475-6773.2006.00684.x [published Online First: 2007/02/09]
- 44 54. Sbaraini A, Carter SM, Evans RW, et al. How to do a grounded theory study: a worked  
45 example of a study of dental practices. *BMC Medical Research Methodology*  
46 2011;11(1):128. doi: 10.1186/1471-2288-11-128
- 47 55. Bradley CJ, Given CW, Roberts C. Race, socioeconomic status, and breast cancer  
48 treatment and survival. *J Natl Cancer Inst* 2002;94(7):490-6. doi: 10.1093/jnci/94.7.490  
49 [published Online First: 2002/04/04]
- 50 56. Newman LA, Griffith KA, Jatoi I, et al. Meta-analysis of survival in African American and  
51 white American patients with breast cancer: ethnicity compared with socioeconomic  
52 status. *J Clin Oncol* 2006;24(9):1342-9. doi: 10.1200/jco.2005.03.3472 [published Online  
53 First: 2006/03/22]
- 54
- 55
- 56
- 57
- 58
- 59
- 60

## Table 1 References

34. Mallik-Kane K, Liberman A, Dubay L, et al. Using Jail to Enroll Low-Income Men in Medicaid. Washington DC: Urban Institute: Justice Policy Center, 2016.

## FIGURE LEGENDS

### Figure 1: Models Regarding Incarceration and Cancer Disparities

There are two potential models for the relationship between criminal justice involvement and disparities in cancer treatment and outcomes. The first (Model A; Figure 1) involves a causal link between incarceration health outcomes that is independent of race and ethnicity. That is, incarceration might adversely affect cancer care and outcomes, but the effect is similar for minority and non-minority individuals. In this setting, the fact that minority individuals are more likely to be incarcerated is the driver of worse outcomes for minority individuals. In the second model (Figure 1; Model B), race/ethnicity is an effect modifier in the relation between criminal justice involvement and cancer outcomes, and Black and Latino communities are disproportionately affected by being incarcerated relative to white communities.

### Figure 2: Incarceration and Cancer-Related Outcomes Mixed Methods Study Schema

### Figure 3: Timeline of the ICRO Study



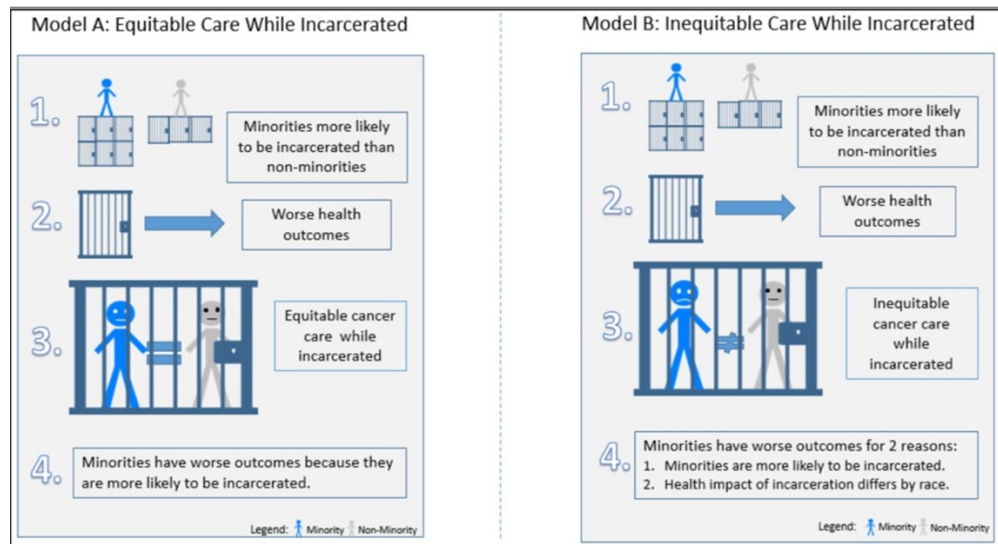

**Figure 1: Models Regarding Incarceration and Cancer Disparities** There are two potential models for the relationship between criminal justice involvement and disparities in cancer treatment and outcomes. The first (Model A; Figure 1) involves a causal link between incarceration and health outcomes that is independent of race and ethnicity. That is, incarceration might adversely affect cancer care and outcomes, but the effect is similar for minority and non-minority individuals. In this setting, the fact that minority individuals are more likely to be incarcerated is the driver of worse outcomes for minority individuals. In the second model (Figure 1; Model B), race/ethnicity is an effect modifier in the relation between criminal justice involvement and cancer outcomes, and Black and Latino communities are disproportionately affected by being incarcerated relative to white communities.

304x166mm (96 x 96 DPI)

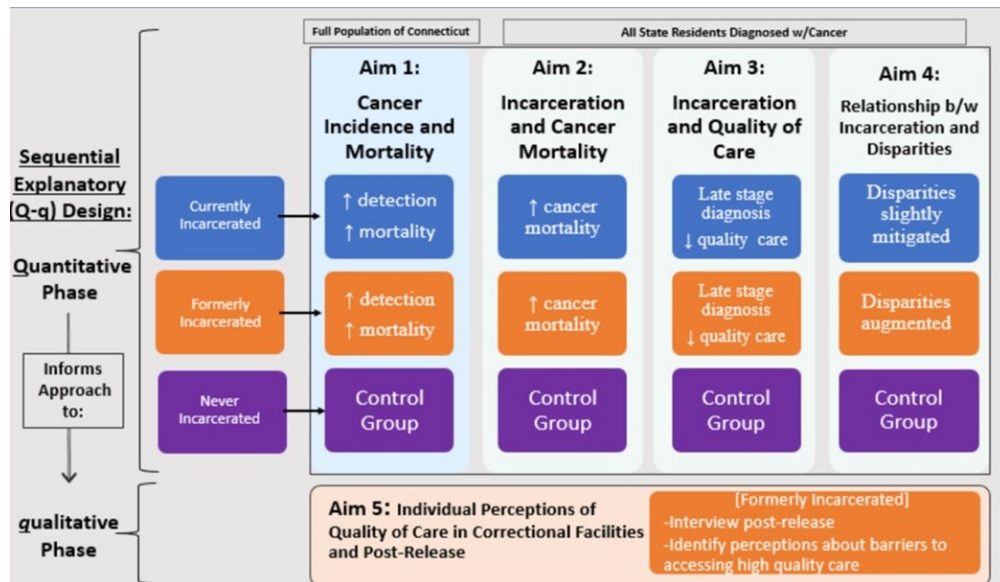

**Figure 2: Incarceration and Cancer-Related Outcomes Mixed Methods Study Schema**

276x159mm (96 x 96 DPI)

| TASK                                                                                                                 | Year and Month of Grant Funding |      |        |       |        |       |        |       |
|----------------------------------------------------------------------------------------------------------------------|---------------------------------|------|--------|-------|--------|-------|--------|-------|
|                                                                                                                      | Year 1                          |      | Year 2 |       | Year 3 |       | Year 4 |       |
|                                                                                                                      | 1-6                             | 7-12 | 13-18  | 19-24 | 25-30  | 31-36 | 37-42  | 43-48 |
| <b>Study start-up</b>                                                                                                |                                 |      |        |       |        |       |        |       |
| Hire/train research staff                                                                                            | ■                               |      |        |       |        |       |        |       |
| IRB approval                                                                                                         | ■                               |      |        |       |        |       |        |       |
| <b>Aim 1: Cancer Incidence &amp; Mortality</b>                                                                       |                                 |      |        |       |        |       |        |       |
| Linkage of Department of Correction (DOC) and Connecticut Tumor Registry (CTR) Data, and Department of Public Health |                                 | ■    |        |       |        |       |        |       |
| Analysis of linked DOC and CTR data                                                                                  |                                 |      | ■      |       |        |       |        |       |
| <b>Aims 2-4: Incarceration, Cancer Care and Outcomes</b>                                                             |                                 |      |        |       |        |       |        |       |
| Assessment of cancer care using CTR data supplemented by Rapid Case Ascertainment                                    |                                 | ■    | ■      |       |        |       |        |       |
| Data entry, management & cleaning, analysis                                                                          |                                 |      | ■      | ■     | ■      |       |        |       |
| Analysis of linked data                                                                                              |                                 |      | ■      | ■     | ■      |       |        |       |
| <b>Aim 5 (Qualitative Study)</b>                                                                                     |                                 |      |        |       |        |       |        |       |
| Iterative design of Discussion Guide (built upon Aims 1-4 findings)                                                  |                                 |      |        |       | ■      |       |        |       |
| Pilot testing                                                                                                        |                                 |      |        |       |        | ■     |        |       |
| Patient interviews                                                                                                   |                                 |      |        |       |        | ■     | ■      |       |
| Data coding                                                                                                          |                                 |      |        |       |        |       | ■      | ■     |
| <b>Project Management &amp; Operations</b>                                                                           |                                 |      |        |       |        |       |        |       |
| Research team meetings                                                                                               | ■                               | ■    | ■      | ■     | ■      | ■     | ■      | ■     |
| Advisory board meetings                                                                                              | ■                               | ■    | ■      | ■     | ■      | ■     | ■      | ■     |
| Manuscript preparation & submission                                                                                  | ■                               | ■    | ■      | ■     | ■      | ■     | ■      | ■     |
| Stakeholder dissemination                                                                                            |                                 |      | ■      | ■     | ■      | ■     | ■      | ■     |

**Figure 3: Timeline of the ICRO Study**

343x249mm (144 x 144 DPI)

# BMJ Open

## Incarceration and Cancer-Related Outcomes (ICRO) Study Protocol: Using a Mixed Methods Approach to Investigate the Role of Incarceration on Cancer Incidence, Mortality, and Quality of Care

|                                 |                                                                                                                                                                                                                                                                                                                                                                                                                                                                                                                                                                                                                                                                                                                                                                                                                                                                                                                                                                                                                                                    |
|---------------------------------|----------------------------------------------------------------------------------------------------------------------------------------------------------------------------------------------------------------------------------------------------------------------------------------------------------------------------------------------------------------------------------------------------------------------------------------------------------------------------------------------------------------------------------------------------------------------------------------------------------------------------------------------------------------------------------------------------------------------------------------------------------------------------------------------------------------------------------------------------------------------------------------------------------------------------------------------------------------------------------------------------------------------------------------------------|
| Journal:                        | <i>BMJ Open</i>                                                                                                                                                                                                                                                                                                                                                                                                                                                                                                                                                                                                                                                                                                                                                                                                                                                                                                                                                                                                                                    |
| Manuscript ID                   | bmjopen-2021-048863.R1                                                                                                                                                                                                                                                                                                                                                                                                                                                                                                                                                                                                                                                                                                                                                                                                                                                                                                                                                                                                                             |
| Article Type:                   | Protocol                                                                                                                                                                                                                                                                                                                                                                                                                                                                                                                                                                                                                                                                                                                                                                                                                                                                                                                                                                                                                                           |
| Date Submitted by the Author:   | 25-Mar-2021                                                                                                                                                                                                                                                                                                                                                                                                                                                                                                                                                                                                                                                                                                                                                                                                                                                                                                                                                                                                                                        |
| Complete List of Authors:       | Puglisi, Lisa; Yale School of Medicine, SEICHE Center for Health and Justice, Department of Internal Medicine<br>Halberstam, Alexandra; Yale University<br>Aminawung, Jenerius; Yale School of Medicine, SEICHE Center for Health and Justice, Department of Internal Medicine<br>Gallagher, Colleen; Connecticut Department of Corrections<br>Gonsalves, Lou; Connecticut Department of Public Health, Connecticut Tumor Registry<br>Schulman-Green, Dena; New York University, Rory Meyers College of Nursing<br>Lin, Hsiu-ju; University of Connecticut System; Connecticut Department of Mental Health and Addiction Services<br>Metha, Rajni; Yale University Yale Cancer Center, Yale Rapid Case Ascertainment<br>Mun, Sophia ; Yale COPPER<br>Oladeru, Oluwadamilola; Brigham and Women's Hospital, Harvard Radiology Oncology Program<br>Gross, Cary; Yale School of Medicine, Department of Internal Medicine, Yale COPPER<br>Wang, Emily; Yale School of Medicine, SEICHE Center for Health and Justice, Department of Internal Medicine |
| <b>Primary Subject Heading</b>: | Epidemiology                                                                                                                                                                                                                                                                                                                                                                                                                                                                                                                                                                                                                                                                                                                                                                                                                                                                                                                                                                                                                                       |
| Secondary Subject Heading:      | Oncology, Public health, Research methods                                                                                                                                                                                                                                                                                                                                                                                                                                                                                                                                                                                                                                                                                                                                                                                                                                                                                                                                                                                                          |
| Keywords:                       | EPIDEMIOLOGY, ONCOLOGY, Protocols & guidelines < HEALTH SERVICES ADMINISTRATION & MANAGEMENT, PUBLIC HEALTH, Epidemiology < ONCOLOGY                                                                                                                                                                                                                                                                                                                                                                                                                                                                                                                                                                                                                                                                                                                                                                                                                                                                                                               |
|                                 |                                                                                                                                                                                                                                                                                                                                                                                                                                                                                                                                                                                                                                                                                                                                                                                                                                                                                                                                                                                                                                                    |

SCHOLARONE™  
Manuscripts

1  
2  
3  
4  
5  
6  
7  
8  
9  
10  
11  
12  
13  
14  
15  
16  
17  
18  
19  
20  
21  
22  
23  
24  
25  
26  
27  
28  
29  
30  
31  
32  
33  
34  
35  
36  
37  
38  
39  
40  
41  
42  
43  
44  
45  
46  
47  
48  
49  
50  
51  
52  
53  
54  
55  
56  
57  
58  
59  
60

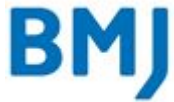

I, the Submitting Author has the right to grant and does grant on behalf of all authors of the Work (as defined in the below author licence), an exclusive licence and/or a non-exclusive licence for contributions from authors who are: i) UK Crown employees; ii) where BMJ has agreed a CC-BY licence shall apply, and/or iii) in accordance with the terms applicable for US Federal Government officers or employees acting as part of their official duties; on a worldwide, perpetual, irrevocable, royalty-free basis to BMJ Publishing Group Ltd ("BMJ") its licensees and where the relevant Journal is co-owned by BMJ to the co-owners of the Journal, to publish the Work in this journal and any other BMJ products and to exploit all rights, as set out in our [licence](#).

The Submitting Author accepts and understands that any supply made under these terms is made by BMJ to the Submitting Author unless you are acting as an employee on behalf of your employer or a postgraduate student of an affiliated institution which is paying any applicable article publishing charge ("APC") for Open Access articles. Where the Submitting Author wishes to make the Work available on an Open Access basis (and intends to pay the relevant APC), the terms of reuse of such Open Access shall be governed by a Creative Commons licence – details of these licences and which [Creative Commons](#) licence will apply to this Work are set out in our licence referred to above.

Other than as permitted in any relevant BMJ Author's Self Archiving Policies, I confirm this Work has not been accepted for publication elsewhere, is not being considered for publication elsewhere and does not duplicate material already published. I confirm all authors consent to publication of this Work and authorise the granting of this licence.

1  
2  
3 **Title:** Incarceration and Cancer-Related Outcomes (ICRO) Study Protocol: Using a Mixed  
4  
5 Methods Approach to Investigate the Role of Incarceration on Cancer Incidence, Mortality, and  
6  
7 Quality of Care  
8  
9

10  
11 Lisa B. Puglisi,<sup>1,2</sup> Alexandra A. Halberstam,<sup>3</sup> Jenerius Aminawung,<sup>1,2</sup> Colleen Gallagher,<sup>4</sup> Lou  
12  
13 Gonsalves,<sup>5</sup> Dena Schulman-Green,<sup>6</sup> Hsiuju Lin,<sup>7,8</sup> Rajni Metha,<sup>9</sup> Sophia Mun,<sup>10</sup> Oluwadamilola  
14  
15 Oladeru,<sup>11</sup> Cary P. Gross,<sup>2,10\*</sup> Emily A. Wang.<sup>1,2\*</sup>  
16  
17  
18  
19

20 <sup>1</sup> SEICHE Center for Health and Justice, Yale School of Medicine, New Haven, CT, USA  
21

22 <sup>2</sup> Department of Internal Medicine, Yale School of Medicine, New Haven, CT, USA  
23

24 <sup>3</sup> Yale University, New Haven, CT, USA  
25

26 <sup>4</sup> Connecticut Department of Correction, Wethersfield, CT, USA  
27

28 <sup>5</sup> Connecticut Tumor Registry, Connecticut Department of Public Health, Hartford, CT, USA  
29

30 <sup>6</sup> New York University, Rory Meyers College of Nursing, New York, NY, USA  
31

32 <sup>7</sup> University of Connecticut, Department of Social Work, Storrs, CT, USA  
33

34 <sup>8</sup> Connecticut Department of Mental Health and Addiction Services, USA  
35

36 <sup>9</sup> Yale Rapid Case Ascertainment, Yale University Yale Cancer Center, New Haven, CT, USA  
37

38 <sup>10</sup> Yale COPPER, New Haven, CT, USA  
39

40 <sup>11</sup> Brigham and Women's Hospital, Harvard Radiology Oncology Program, Boston, MA, USA  
41  
42

43 \*Denotes co-senior authors  
44  
45

46 **Corresponding author:**

47 Lisa B. Puglisi  
48 300 George Street  
49 Room G05  
50 New Haven, Connecticut, 06511  
51 lisa.puglisi@yale.edu  
52

53 **Word count:** 3910  
54

55 **Key words:** cancer, health equity, prison, incarceration  
56  
57  
58  
59  
60

## ABSTRACT

**Introduction:** Incarceration is associated with decreased cancer screening rates and a higher risk for hospitalization and death from cancer after release from prison. However, there is a paucity of data on the relationship between incarceration and cancer outcomes and quality of care. In the Incarceration and Cancer-Related Outcomes (ICRO) Study, we aim to develop a nuanced understanding of how incarceration affects cancer incidence, mortality, and treatment, and moderates the relationship between socioeconomic status, structural racism, and cancer disparities.

**Methods and analysis:** We will use a sequential explanatory mixed methods study design. We will create the first comprehensive linkage of data from the Connecticut Department of Correction and the statewide Connecticut Tumor Registry. Using the linked dataset, we will examine differences in cancer incidence and stage at diagnosis between individuals currently incarcerated, formerly incarcerated, and never incarcerated in Connecticut from 2005-2016. Among individuals with invasive cancer, we will assess relationships among incarceration, quality of cancer care, and mortality, and will assess the degree to which incarceration status moderates relationships among race, socioeconomic status, quality of cancer care, and cancer mortality. We will use multivariable logistic regression and Cox survival models with interaction terms as appropriate. These results will inform our conduct of in-depth interviews with individuals diagnosed with cancer during or shortly after incarceration regarding their experiences with cancer care in the correctional system and the immediate post-release period. The results of this qualitative work will help contextualize the results of the data linkage.

**Ethics and Dissemination:** The Yale University Institutional Review Board (#2000022899) and the Connecticut Department of Public Health Human Investigations Committee approved this study. We will disseminate study findings through peer-reviewed publications and academic and community presentations. Access to the de-identified quantitative and qualitative datasets will be made available upon review of the request.

**Registration Details:** Not Applicable



## ARTICLE SUMMARY

### Strengths and Limitations of this Study

- We will use a mixed-methods sequential explanatory design to examine cancer incidence, outcomes, and quality of care among individuals currently incarcerated, formerly incarcerated, and never incarcerated in Connecticut from 2005-2016 and will be the first study to explore the relationship between incarceration and racial and socioeconomic disparities in cancer.
- We will devise innovative partnerships among the Connecticut Tumor Registry (CTR), the Connecticut Department of Correction (CDOC) and Yale Cancer Center Rapid Case Ascertainment (RCA) to create a novel administrative data linkage registry.
- Our findings will be based on a single state's correctional system, and Connecticut has unique state Medicaid policies which may limit the applicability of our findings to other states' correctional populations.
- We rely on registry data rather than self-reported measures of race, ethnicity, and socioeconomic status, and attempts to disentangle race from other sociodemographic characteristics may not yield consistent results.

## INTRODUCTION

The United States (U.S.) adult prison population tripled between 1987 and 2015. According to recent data, 2.2 million Americans are incarcerated at any given time,[1] and these individuals are disproportionately racial and ethnic minorities and of lower socioeconomic class.[2] Incarceration is associated with a higher risk of illness and death after release, including from cancer.[3-5] Given the disproportionate impact of mass incarceration on Black and Latinx populations and individuals with lower socioeconomic status, as well as related detrimental health effects, incarceration may also be associated with racial and socioeconomic disparities in cancer outcomes. Past studies documenting the existence of such disparities have focused on assessing the potential influence of biology, health behaviors, bias, or access to high quality care.[6] These analyses, however, have largely failed to measure criminal justice exposure directly, or have done so in limited ways.

There are a number of reasons that having been incarcerated would place individuals at higher risk for developing cancer. In 2016, 30.2% of illness-related deaths in U.S. state prisons were attributed to cancer, making it the leading cause of illness-related deaths in the incarcerated population.[7] Studies suggest that incarcerated individuals are often at least ten years older in physiologic age than chronologic age,[8] and accelerated aging predisposes individuals to chronic and geriatric illnesses, including cancer. Researchers have also noted higher rates of self-reported cancer in incarcerated populations[9,10] and indirectly found that incarceration increases cancer risk factors.[11] Cancer risk factors include smoking, substance use, and infectious disease and are more prevalent in incarcerated people compared with the general population.[12-14] Additionally, individuals with a history of incarceration have higher rates of co-morbidities, including alcohol and substance use disorders and mental health conditions compared with the general population, making treatment management more difficult.[15] Moreover, high levels of stress during incarceration have been described in prison

1  
2  
3 ethnographies,[16,17] and given that cancers are mediated by inflammatory processes, there  
4 may be a higher incidence of cancer in this population.  
5  
6

7         Despite these data, the nature of association between incarceration and cancer  
8 outcomes remains unclear (Figure 1). When considering screening or prompt diagnosis after  
9 symptom onset, incarceration may counterintuitively improve cancer outcomes for minorities  
10 and individuals of low socioeconomic status given constitutionally guaranteed access to  
11 healthcare during incarceration. This hypothesis is informed by the fact that many adults first  
12 engage with the health care system during their incarceration, and as a result, approximately  
13 40% receive their first diagnosis of a chronic condition while incarcerated.[18] Improved access  
14 to healthcare services, reduced access to illicit drugs and alcohol, and enforced adherence to  
15 medications may improve overall health while incarcerated.  
16  
17

18         Conversely, it is plausible that incarceration is associated with worse cancer  
19 outcomes.[19] While research examining quality of care provided to currently or formerly  
20 incarcerated individuals is limited,[20,21] cost-cutting methods and co-payments may limit  
21 access to cancer care.[22] In one study, researchers noted inadequate pain management  
22 among incarcerated individuals with cancer pain but did not assess cancer treatment.[23]  
23  
24 Another study demonstrated that many individuals do not receive screening during incarceration  
25 despite its availability in prison. For instance, of all individuals held in San Francisco jails, only  
26 41% of women older than 40 reported having a mammogram within two years, and only 31% of  
27 individuals older than 50 reported having a colonoscopy.[24] Incarcerated individuals are also  
28 likely unaware of cancer screening guidelines, considering the high rates of inadequate health  
29 literacy among justice-involved populations.[25]  
30  
31

32         Additionally, when individuals are released from a correctional facility, they frequently  
33 lose any improvements in health and experience worse health outcomes compared with those  
34 never incarcerated. A prior study demonstrated that Medicare beneficiaries recently released  
35 from correctional facilities had higher cancer-related hospitalization rates, along with an  
36  
37  
38  
39  
40  
41  
42  
43  
44  
45  
46  
47  
48  
49  
50  
51  
52  
53  
54  
55  
56  
57  
58  
59  
60

1  
2  
3 increased risk of cancer-related mortality, compared with the general population.[26] This result  
4  
5 could be due to stressors related to securing housing, food, and work post-release — tasks  
6  
7 more difficult with a criminal record.[27] These barriers may prevent individuals from obtaining  
8  
9 primary care and health insurance and resuming their cancer-directed treatments.[28,29]  
10

11 Through the ICRO study, we will attempt to fill these knowledge gaps and examine the  
12  
13 impact of incarceration, independent from socioeconomic differences and other confounding  
14  
15 factors, on cancer incidence, quality of care, and mortality, and assess the degree to which  
16  
17 incarceration status moderates relationships among race, socioeconomic status, quality of  
18  
19 cancer care, and cancer mortality.  
20

## 21 22 23 24 **METHODS AND ANALYSIS**

### 25 26 **Study design**

27  
28 We will use a mixed methods sequential explanatory design to investigate the  
29  
30 relationship between incarceration and cancer outcomes (Figure 2). This is a design which  
31  
32 includes two distinct consecutive phases: quantitative followed by qualitative, where the second  
33  
34 phase builds upon the results of the first.[30] Specifically, we will create the first comprehensive,  
35  
36 population-based linkage of a statewide cancer registry, the Connecticut Tumor Registry (CTR),  
37  
38 which includes mortality data, and the movement database of the Connecticut Department of  
39  
40 Correction (CDOC). Novel data linkages are needed to study the relationship between  
41  
42 incarceration and cancer outcomes in part because incarceration status is not addressed by  
43  
44 large, national population-based surveys such as the Behavioral Risk Factor Surveillance  
45  
46 System or the National Health Interview Survey, or by the national cancer registration programs  
47  
48 (the National Cancer Institute's Surveillance, Epidemiology, and End Results (SEER) program  
49  
50 and the Centers for Disease Control and Prevention's National Program of Cancer Registries  
51  
52 (NPCR)).  
53  
54  
55  
56  
57  
58  
59  
60

1  
2  
3 We will link these databases based on probabilistic matching of individual cases using  
4 name, date of birth, sex and social security number to ensure accuracy. We will then assemble  
5 retrospective cohorts with members who are currently, formerly, or never incarcerated in  
6 Connecticut between 2005-2016. Incarceration will be defined as having a history of being  
7 admitted to CDOC, whether remanded (admitted to custody, but not yet sentenced) or  
8 incarcerated (sentenced to either jail or prison). The “never incarcerated” cohort will be defined  
9 as individuals who did not appear in CDOC movement files between 2005-2016. Once we have  
10 identified these cohorts, we will extract their linked data. We will not track individuals who move  
11 out of Connecticut during the study period.  
12  
13  
14  
15  
16  
17  
18  
19  
20  
21

22 Population-level epidemiologic data from our linkage will provide an inroad into  
23 understanding the impact of incarceration on cancer outcomes and treatment quality, and into  
24 how mass incarceration may contribute to racial and socioeconomic cancer disparities. Yet, only  
25 direct narratives from individuals diagnosed with cancer can provide an in-depth understanding  
26 of individual and health system factors associated with quality of care during and immediately  
27 after release.[31] Within our sequential explanatory design, we will use quantitative data from  
28 our data linkage to design interview guides that we will use to conduct one-on-one interviews  
29 with unique individuals who were released from CDOC within the prior month. This qualitative  
30 component will function to refine and explain quantitative results.  
31  
32  
33  
34  
35  
36  
37  
38  
39  
40

41 Connecticut, a state with the nation’s second highest income gap,[32] and wide racial  
42 disparities in incarceration,[33] is an ideal setting to study the relationship between  
43 incarceration, cancer outcomes, and racial and socioeconomic disparities. The CTR is the  
44 oldest cancer registry in the country and is highly regarded for its quality and long-standing track  
45 record of productive academic collaboration. The CDOC also has a combined criminal justice  
46 system where jails and prisons are under the authority of a single agency, thus allowing for  
47 easier data linkages.  
48  
49  
50  
51  
52  
53  
54  
55  
56  
57  
58  
59  
60

## Data Sets and Linkage

Descriptions of the data sets for linkage in the ICRO study are presented in Table 1.

**Table 1: Data sets for Linkage**

| Database                                    | Description                                                                                                                                                                                                                                                                                                                                                                                                                                                                                                                                                                                                                                                                                                                                                                                                                                                                                             | Key Variables                                                                                                                                                                                                                                                  |
|---------------------------------------------|---------------------------------------------------------------------------------------------------------------------------------------------------------------------------------------------------------------------------------------------------------------------------------------------------------------------------------------------------------------------------------------------------------------------------------------------------------------------------------------------------------------------------------------------------------------------------------------------------------------------------------------------------------------------------------------------------------------------------------------------------------------------------------------------------------------------------------------------------------------------------------------------------------|----------------------------------------------------------------------------------------------------------------------------------------------------------------------------------------------------------------------------------------------------------------|
| The Connecticut Tumor Registry (CTR)        | The CTR is a population-based resource for examining cancer patterns in Connecticut which includes all reported cancers diagnosed in Connecticut residents since 1935, as well as follow-up, treatment, and survival data. All licensed medical providers, as well as hospitals and private pathology laboratories in the state, are required by law to report cancer cases to the registry, including those that care for incarcerated individuals. The CTR is the oldest population-based cancer registry in the country. Rigorous quality control procedures, stringent requirements in case reporting, and reciprocal cancer reporting agreements with neighboring states allow the registry to identify cancers among all Connecticut residents even when diagnosed or treated in other states. CTR data have been used widely in research into cancer etiology, epidemiology and quality of care. | Name*, date of birth*, social security number*, age, race/ethnicity, marital status, sex, residential census tract at time of diagnosis, insurance at time of diagnosis, dates of diagnosis and treatment, vital status, date of last contact, cause of death. |
| Connecticut Department of Correction (CDOC) | The CDOC has an annual population of approximately 15,000 individuals, with disproportionate incarceration of racial and ethnic minorities (demographically similar to rates of incarceration nationwide). CDOC also has a combined criminal justice system, where jails and prisons are under the authority of a single agency. CDOC supports research aimed at improving the health of, and reducing recidivism for, justice involved individuals and has partnered with many academic institutions on federally funded grants.[34]                                                                                                                                                                                                                                                                                                                                                                   | Dates of incarceration, date of release (if applicable), inmate name*, any known alias(es)*, inmate number, place of incarceration, date of birth*, race, social security number*, sex, and place of birth.                                                    |

\* These variables were used in the record linkage only and were not part of the analytic dataset.

The Yale Cancer Center's Rapid Case Ascertainment (RCA) Shared Resource, developed in 1986 in response to a Connecticut Hospital Association request to establish a single entity that would be responsible for all aspects of population-based cancer epidemiology studies, will abstract medical records. RCA staff function as agents of the CTR and can conduct record reviews to address information missing from the CTR. RCA can thus abstract patient-specific treatment data including diagnostic, imaging and pathology reports, and clinical notes in each hospital's electronic medical record or paper charts.

1  
2  
3 Using data collected between 2005 and 2016, we will use Match\*Pro, a probabilistic  
4 record linkage software program available from the National Cancer Institute,[35] to link CDOC  
5 movement files to CTR data using first name, last name, sex, date of birth and social security  
6 number. The linkage methodology is based upon the Fellegi and Sunter model.[36] We will  
7 extract data for matched cases on cancer diagnosis (primary site, date, histology), stage of  
8 disease, vital status, date of last contact and cause of death (if deceased) from the CTR. In  
9 previous studies, CDOC data has been linked to state health insurance data using sophisticated  
10 probabilistic and deterministic algorithms with reported sensitivity and positive predictive values  
11 in the mid 90 percent range.  
12  
13  
14  
15  
16  
17  
18  
19  
20  
21  
22

### 23 **Patient and Public Involvement**

24  
25 Our multidisciplinary study team consists of health services researchers, oncologists,  
26 primary care doctors, statisticians, and individuals with a history of incarceration. For the  
27 qualitative component, we will work with individuals with a history of incarceration to design an  
28 interview guide, conduct qualitative in-depth interviews, and iteratively code and identify themes  
29 related to quality of cancer treatment. Community healthcare workers, who have a history of  
30 incarceration and are experienced in conducting research with vulnerable populations, will be  
31 trained to conduct the interviews. We will convene a Study Advisory Board which consists of  
32 correctional providers, oncologists, policymakers, individuals with cancer and a history of  
33 incarceration, and community advocates. The board will meet quarterly to provide input on  
34 research progress and findings.  
35  
36  
37  
38  
39  
40  
41  
42  
43  
44  
45  
46  
47

### 48 **Planned analyses**

#### 49 **Cancer incidence and mortality analyses**

50  
51 We will use the linked dataset to compare new cancer diagnoses, cancer incidence rate,  
52 quality of cancer care, and cancer-related deaths among Connecticut residents currently,  
53  
54  
55  
56  
57  
58  
59  
60

1  
2  
3 formerly, and never incarcerated. First, for the cancer incidence rate among individuals currently  
4 incarcerated, we will divide the number of individuals with new primary cancers diagnosed  
5 between the date of admission to custody in 2005 and December 31, 2016, by the person-years  
6 at risk of incident cancer, defined as the difference between the date of admission to custody in  
7 2005 and December 31, 2016, death, diagnosis of primary cancer, or release (whichever  
8 occurred first). If an individual was released and re-incarcerated, the period of time between the  
9 date of re-admission, and their death, diagnosis of cancer, or December 31, 2014, will be added  
10 to their person-time “incarcerated.” Second, for the released group, we will use CDOC data to  
11 estimate the number of formerly incarcerated individuals living in Connecticut in each age/sex  
12 strata. In each stratum, we will calculate the number of person-years as the population at risk  
13 and employ CTR data to calculate age-adjusted incidence and mortality. Finally, for those never  
14 incarcerated between 2005 and 2016, we will divide number of new primary cancers diagnosed  
15 by the person-years at risk of incident cancer. The “never incarcerated” group will be estimated  
16 by subtracting the currently and formerly incarcerated individuals from the Connecticut  
17 population data by age/sex group as obtained from Census data.

18  
19 To measure the associations among incarceration, cancer incidence and mortality, we  
20 will estimate population attributable risk from incarceration with the equation  $p(ec) \times (OR-1) / OR$ ,  
21 where  $p(ec)$  is the proportion exposed (i.e., experience with incarceration) among  
22 individuals.[28] We will use two tailed chi-square tests to compare cancer incidence and  
23 mortality rates among currently incarcerated, ever incarcerated, and never incarcerated  
24 groups. To detect a difference in incidence and mortality rate equivalent to a medium effect size  
25 (OR=3.47, or Cohen  $d=0.5$ ) or a small effect size (OR=1.68, or Cohen=0.2), with  $\alpha=0.05$   
26 and power=80%, each group will need  $N=107$  or  $N=964$ . Our large sample size will grant more  
27 than sufficient statistical power to detect clinical meaningful effect size.



## Incarceration and Mortality

To assess the relationship between incarceration and cancer mortality among Connecticut residents diagnosed with cancer during 2005-2016, we will use Cox regression models to evaluate the independent association of incarceration states and cancer mortality. We will calculate descriptive statistics for each independent variable, stratified by incarceration status. The extended Cox model will use binary incarcerated status as the time-varying covariate as well as other time-fixed covariates. Time-fixed covariates of interest include age, sex, race/ethnicity (categorized into Hispanic, non-Hispanic white, black, and other racial groups), marital status (categorized into single, separated, divorced, widowed, and unmarried partner), insurance at the time of diagnosis (no insurance, insurance, and other if unknown), mortality, incarceration history prior to the time of diagnosis, and socioeconomic states. We will categorize poverty into 4 levels using the Census Tract Poverty Indicator. We will use a Cox model with time-dependent incarcerated status covariate to assess the association between incarceration status and risk of cancer mortality. We will also evaluate the association between place of diagnosis (i.e., during incarceration, post-incarceration within a defined time frame of release, and never incarcerated) and cancer incidence and risk of mortality. Finally, we will include clinical factors such as late stage of diagnosis to assess whether the relation between incarceration and cancer mortality is mediated by diagnosis stage or treatment timeliness.

To estimate an adequate sample size for this survival analyses, we used Singer and Willett's sample size table,[37] which provides minimum total sample sizes necessary to achieve a reasonable power level based on the ratio of median lifetimes ( $R=m1/m2$ ) and length of follow-up ( $F=T/A$ , where  $T$ =total length of follow-up, and  $A=m1/m2$ ). A previous study found median survival times of 21 months for incarcerated cases and 54 months for a matched SEER cohort, which corresponds to a large effect size of  $R=2.57$ . [10] When median lifespan in one group is twice as long as median lifespan in the other, the study will have an 80% chance of detecting this difference using only  $N=100-200$  cases. With a more conservative estimate,

1  
2  
3 assuming a minimum detectable effect size of  $R=1.5-1.75$ , a significance level of 0.05, and 80%  
4 of power, we will need an  $N=122$  or  $N=296$ .  
5  
6  
7

#### 8 9 Quality of cancer care analyses 10

11 We will ascertain quality of care using two approaches. First, we will assess timeliness of care,  
12 defined as the system's capacity to provide care quickly after a need is recognized.[38] Guidelines and  
13 prior empiric studies have defined treatment delay as the temporal period between diagnosis and  
14 definitive cancer treatment and examined the significance of treatment delay for many common cancer  
15 types.[39-41] We will employ a common definition of delay as  $>30$  days between diagnosis and initial  
16 treatment.[42] Second, we will assess adherence to care processes recommended for each major  
17 cancer type. For instance, we will assess the use of curative cancer therapy among men with  
18 intermediate or high grade localized prostate cancer.[43]  
19  
20  
21  
22  
23  
24  
25  
26  
27

28 Yale RCA staff will conduct a medical chart review to both validate CTR data and abstract  
29 additional information about quality and timeliness of care, including receipt of cancer directed therapy  
30 for non-metastatic disease, dates of surgery, radiation therapy, and clinicopathologic tests for each  
31 diagnosis. We will use a rigorous, multi-step approach to train abstractors and assure quality of  
32 medical record abstraction.[44] To measure the association between incarceration and quality of  
33 cancer care, we will use descriptive statistics to characterize receipt of care for individuals based on  
34 their incarceration status at the time of diagnosis and use chi-square tests to compare. We will use  
35 logistic regression to assess the association between incarceration and treatment delay (yes/no) and  
36 treatment concordant-care (yes/no). We will adjust for individual characteristics, including age, sex,  
37 race, ethnicity, marital status, insurance at time of diagnosis, and socioeconomic status (percent of  
38 families living below the poverty level derived from individual census tract.) Poverty, race/ethnicity,  
39 marital status, and insurance will be grouped as noted above. We will also examine additional variables  
40 including place of diagnosis and sex as they are associated with mortality and quality of care. In our  
41 analysis of sex as a biological variable, we will focus on cancers that can affect women, excluding  
42  
43  
44  
45  
46  
47  
48  
49  
50  
51  
52  
53  
54  
55  
56  
57  
58  
59  
60

1  
2  
3 cancers that only affect male reproductive organs. Sex can be an important source of variation in  
4 detection, quality of care, and mortality both because correctional facilities that care for women and the  
5 challenges women face upon release are unique.[45]  
6  
7

8  
9 To estimate the number of participants needed for multivariate regression models, we used a  
10 logistic regression sample size estimation method.[46] We performed calculations with the following  
11 assumptions: 1) the ability to detect an odds ratio of 1.5 (equivalent to a small effect size);[47] 2) two-  
12 sided 0.05 significance level; 3) adjustment of R-squared of 0.4 (i.e., R-squared achieved when the  
13 independent variable of interest is regressed on the other covariates in the regression). Given such  
14 assumptions, we will need to review medical records from 308 patients from the entire study sample to  
15 achieve 80% statistical power. Breast cancer will likely be the smallest number of cancers we identify  
16 given the population of incarcerated individuals. We will be able to look at breast cancer outcomes and  
17 detect a minimum of small to medium effect size of OR=2.0 if there are at least 86 breast cancers  
18 diagnosed in CDOC (assuming 80% statistical power, two-sided test with significance level of  
19 0.05).[48]  
20  
21  
22  
23  
24  
25  
26  
27  
28  
29  
30  
31  
32  
33  
34

### 35 Incarceration and cancer disparities analysis

36  
37 To assess how incarceration status moderates the relationships between race and ethnicity (as  
38 a socially, not biologically related variable), socioeconomic status, and quality of cancer care and  
39 cancer mortality, we will measure Black-white and socioeconomic disparities in cancer treatment and  
40 mortality before and after adjusting for incarceration status in a multivariable model. The difference in  
41 the race parameter estimate before versus after adjusting for incarceration status will be reported to  
42 estimate the degree to which incarceration mediates the relation between race and ethnicity and  
43 cancer outcomes. We will also measure the high and low socioeconomic disparity and statistically test  
44 whether exposure to incarceration moderates observed associations. In addition to the overall cancer  
45 model, we will analyze each primary cancer diagnosis separately when sample size permits.  
46  
47  
48  
49  
50  
51  
52  
53  
54  
55  
56  
57  
58  
59  
60

### Qualitative investigation of factors associated with cancer care

We will use findings from our quantitative assessments to select cancer types and stages that may be particularly vulnerable to poor quality care among previously incarcerated individuals and to inform the interview guide. Eligible participants must have been released from CDOC within one month and diagnosed with cancer. We will use a purposeful sampling strategy to capture diverse perspectives from key groups of interest (gender, race/ethnicity, disease status).[49] Multi-pronged recruitment will include direct engagement at a primary care clinic for individuals with a history of incarceration, participant word of mouth, referral from the CDOC, and direct referrals from community health workers. Participants will receive a \$30 gift card as remuneration. We will over-sample women to more fully characterize the experience of cancer care for people in the women's facility and expect to interview close to 20 people. Two members of our research team—one with a history of incarceration who will be trained in qualitative interviewing—will lead semi-structured interviews using a standardized interview guide that will include open-ended questions to elucidate how correctional institutions facilitated or constrained management of cancer. For instance, for those who were diagnosed with cancer in prison, sample questions include: “What was it like to be diagnosed with cancer in prison?”, “What made it easy or hard to manage your cancer in prison?”, or “What makes it easy or hard to manage cancer now that you have been released?” We will design the interview guide in partnership with the Study Advisory Board. Interviews will be audio-recorded, professionally transcribed, and reviewed for accuracy.

Three members of our research team will meet regularly to analyze interviews.[50] We will initially review five transcripts to develop a preliminary coding structure through inductive coding. This strategy employs an interpretive description approach to qualitative analysis, allowing themes to emerge inductively from participants rather than from researcher preconceptions.[51,52] Code keys will be shared with the full research team and advisory board for feedback periodically. A fourth member of our team will review these transcripts and the

1  
2  
3 preliminary coding structure to assess comprehensiveness and properties of emerging codes.  
4  
5 After developing a preliminary code structure, we will code the first five transcripts  
6  
7 independently, meeting weekly to negotiate consensus and refine our code structure using  
8  
9 constant comparative analysis.[53] This iterative process will allow us to refine to our code  
10  
11 structure, eliminating or consolidating codes where needed[54] until we reach thematic  
12  
13 saturation. We will maintain a thorough audit trail of coding decisions. We will then  
14  
15 systematically apply the final codes to all transcripts. We will use qualitative analysis software  
16  
17 (ATLAS.ti 8.0) to facilitate data organization and analysis.  
18  
19  
20  
21

22 A timeline of the ICRO study is presented in Figure 3.  
23  
24  
25

## 26 **ETHICS AND DISSEMINATION**

27  
28 The Yale University Institutional Review Board (#2000022899) approved the entirety of  
29  
30 this study and the Connecticut Department of Public Health Institutional Review Board Human  
31  
32 Investigations Committee approved the quantitative data matching portion of this study. We will  
33  
34 disseminate study findings through peer-reviewed publications and academic and community  
35  
36 presentations. The access to the de-identified data set and qualitative interview guides will be  
37  
38 made available upon review of the request.  
39  
40  
41  
42

## 43 **DISCUSSION**

44  
45 Our ICRO study will create the first comprehensive linkage of a statewide tumor registry  
46  
47 that includes vital statistics, and correctional system data, integrated with interviews of  
48  
49 individuals with cancer. The study will enable us to develop a nuanced understanding of how  
50  
51 incarceration affects cancer incidence, mortality, treatment, and relates to observed racial and  
52  
53 socioeconomic cancer disparities. We anticipate that this state-level study will provide  
54  
55  
56  
57  
58  
59  
60

1  
2  
3 knowledge to identify and develop ways to improve cancer care in correctional settings as well  
4 as in the community for people just released from correctional facilities.  
5  
6

7           There are several methodological limitations to note. First, accurately matching  
8 individuals across different data sources is an important challenge for any study involving the  
9 creation of a novel, linked data set. Past linkage studies in Connecticut have had 90% success  
10 rate in linking data across participants. Second, sample size of those incarcerated while  
11 diagnosed with cancer may be small. We have conducted sample size calculations, and  
12 estimate sufficient sample size to detect meaningful differences between incarceration exposure  
13 and treatment quality, even in cancers most prevalent in women, (for example, breast cancer),  
14 despite the low incarceration rate of women. However, for cancers where sample size is small,  
15 especially among those diagnosed while incarcerated, we may create a combined variable,  
16 “history of incarceration,” to explore differences between those with and without a history of  
17 incarceration. Third, the CTR data, although highly reliable in identifying incident cancer  
18 diagnoses, may occasionally lack details regarding treatment timeliness and receipt of therapy  
19 beyond the peri-diagnosis period. Therefore, we will partner with the Yale Cancer Center RCA  
20 program, which will enable our team to receive detailed cancer treatment information abstracted  
21 from hospital medical records. Fourth, our measure of race and ethnicity from the CTR is not  
22 self-reported and is derived from the medical record or health care provider/system, and we will  
23 derive measure socioeconomic status from census tract average poverty level. Self-reported  
24 race and ethnicity and individual measures of socioeconomic status would be more accurate,  
25 but these are limitations from any study using registry data to examine racial, ethnic, and  
26 socioeconomic disparities. Fifth, attempts to disentangle race/ethnicity from other  
27 sociodemographic characteristics do not always yield consistent results. In some models,  
28 socioeconomic status accounts for most of the cancer disparities between whites and non-  
29 whites,[55] while other studies have found the association between socioeconomic status and  
30 racial and ethnic disparities is attenuated but not completely explained.[56] For the ICRO study,  
31  
32  
33  
34  
35  
36  
37  
38  
39  
40  
41  
42  
43  
44  
45  
46  
47  
48  
49  
50  
51  
52  
53  
54  
55  
56  
57  
58  
59  
60

1  
2  
3 which would be the first study to explore the relationship between incarceration and racial/ethnic  
4 and socioeconomic cancer disparities, we will examine these characteristics separately. Sixth,  
5 our interviewees will have been released from a single state's correctional system. This means  
6 our findings may not be transferable to all correctional settings. Similarly, given uniquely  
7 stabilizing CDOC and state Medicaid policies, many individuals are released in Connecticut with  
8 health insurance and are more apt to engage in care following release, again limiting the  
9 applicability of the ICRO study to other correctional populations.  
10  
11  
12  
13  
14  
15  
16  
17  
18

19 **AUTHOR CONTRIBUTIONS:** Lisa B. Puglisi, Writing-Original Draft, Investigation, Resources,  
20 Alexandra A. Halberstam, Writing- Original Draft, Jenerius Aminawung, Methodology,  
21 Validation, Data Curation, Writing- Original Draft, Project Administration, Colleen Gallagher,  
22 Conceptualization, Investigation, Lou Gonsalves, Software, Formal Analysis, Writing- Original  
23 Draft Dena Schulman-Green, Writing- Original Draft, Methodology, Investigation, Hsiuju Lin,  
24 Software, Validation, Methodology. Formal Analysis, Data Curation, Rajni Metha, Investigation,  
25 Writing- Original Draft, Sophia Mun, Project Administration, Writing- Original Draft, Visualization,  
26 Oluwadamilola Oladeru, Methodology. Writing- Original Draft, Cary P. Gross,  
27 Conceptualization, Methodology, Writing- Original Draft, Supervision. Emily A. Wang,  
28 Conceptualization, Methodology, Writing-Original Draft, Supervision.  
29

30 **COMPETING INTERESTS STATEMENT:** Dr. Gross has received research funding, though  
31 Yale, from the NCCN Foundation (Pfizer/Astra-Zeneca) and Genentech, as well as funding  
32 from Johnson and Johnson to help devise and implement new approaches to sharing clinical  
33 trial data, and funding from Flatiron Inc. for travel to and speaking at a scientific conference. All  
34 other authors report no competing interests.  
35  
36  
37

38 **FUNDING STATEMENT:** This work was supported by National Institutes of Health grant  
39 number 1R01CA230444-01. The Connecticut Tumor Registry is supported by federal funds  
40 from the National Cancer Institute, National Institutes of Health, Department of Health and  
41 Human Services, under Contract No. HHSN261201800002I.  
42  
43  
44  
45  
46  
47  
48  
49  
50  
51  
52  
53  
54  
55  
56  
57  
58  
59  
60

## REFERENCES

1. Kaeble D, Glaze L, Tsoutis A, et al. Correctional Populations in the United States, 2014. Correctional Populations in the United States Series. Washington, DC: US Department of Justice, Office of Justice Programs, Bureau of Justice Statistics, 2015.
2. Carson E. Prisoners in 2014. Washington, DC: US Department of Justice, Office of Justice Programs, Bureau of Justice Statistics, 2015.
3. Kouyoumdjian FG, Pivnick L, Mclsaac KE, et al. Cancer prevalence, incidence and mortality in people who experience incarceration in Ontario, Canada: A population-based retrospective cohort study. *PLOS ONE* 2017;12(2):e0171131. doi: 10.1371/journal.pone.0171131
4. Binswanger IA, Stern MF, Deyo RA, et al. Release from Prison — A High Risk of Death for Former Inmates. *New England Journal of Medicine* 2007;356(2):157-65. doi: 10.1056/NEJMsa064115
5. Spaulding AC, Seals RM, McCallum VA, et al. Prisoner Survival Inside and Outside of the Institution: Implications for Health-Care Planning. *American Journal of Epidemiology* 2011;173(5):479-87. doi: 10.1093/aje/kwq422
6. Viswanath K, Emmons KM. Message Effects and Social Determinants of Health: Its Application to Cancer Disparities. *Journal of Communication* 2006;56(s1):S238-S64. doi: <https://doi.org/10.1111/j.1460-2466.2006.00292.x>
7. Carson E, Cowhig MP. Mortality in State and Federal Prisons, 2001-2016 – Statistical Tables. Washington, DC: US Department of Justice, Office of Justice Programs, Bureau of Justice Statistics, 2020.
8. Greene M, Ahalt C, Stijacic-Cenzer I, et al. Older adults in jail: high rates and early onset of geriatric conditions. *Health & Justice* 2018;6(1):3. doi: 10.1186/s40352-018-0062-9
9. Binswanger IA, Krueger PM, Steiner JF. Prevalence of chronic medical conditions among jail and prison inmates in the USA compared with the general population. *J Epidemiol Community Health* 2009;63(11):912-9. doi: 10.1136/jech.2009.090662 [published Online First: 2009/08/04]
10. Mathew P, Elting L, Cooksley C, et al. Cancer in an incarcerated population. *Cancer* 2005;104(10):2197-204. doi: <https://doi.org/10.1002/cncr.21468>
11. Kouyoumdjian FG, Andreev EM, Borschmann R, et al. Do people who experience incarceration age more quickly? Exploratory analyses using retrospective cohort data on mortality from Ontario, Canada. *PLOS ONE* 2017;12(4):e0175837. doi: 10.1371/journal.pone.0175837
12. Cropsey K, Eldridge GD, Ladner T. Smoking among female prisoners: An ignored public health epidemic. *Addictive Behaviors* 2004;29(2):425-31. doi: <https://doi.org/10.1016/j.addbeh.2003.08.014>
13. Peters RH, Greenbaum PE, Edens JF, et al. Prevalence of DSM-IV Substance Abuse and Dependence Disorders Among Prison Inmates. *The American Journal of Drug and Alcohol Abuse* 1998;24(4):573-87. doi: 10.3109/00952999809019608
14. Weinbaum CM, Sabin KM, Santibanez SS. Hepatitis B, hepatitis C, and HIV in correctional populations: a review of epidemiology and prevention. *AIDS* 2005;19
15. Fazel S, Baillargeon J. The health of prisoners. *Lancet* 2011;377(9769):956-65. doi: 10.1016/s0140-6736(10)61053-7 [published Online First: 2010/11/26]
16. Sykes GM. *The Society of Captives: A Study of a Maximum Security Prison*. Princeton, NJ: Princeton University Press 1958.
17. Zamble E. Behavior and Adaptation in Long-Term Prison Inmates: Descriptive Longitudinal Results. *Criminal Justice and Behavior* 1992;19(4):409-25. doi: 10.1177/0093854892019004005



18. Wang EA, Hong CS, Shavit S, et al. Engaging Individuals Recently Released From Prison Into Primary Care: A Randomized Trial. *American Journal of Public Health* 2012;102(9):e22-e29. doi: 10.2105/AJPH.2012.300894
19. Wildeman C, Wang EA. Mass incarceration, public health, and widening inequality in the USA. *Lancet* 2017;389(10077):1464-74. doi: 10.1016/s0140-6736(17)30259-3 [published Online First: 2017/04/14]
20. Davies EA, Sehgal A, Linklater KM, et al. Cancer in the London prison population, 1986–2005. *Journal of Public Health* 2010;32(4):526-31. doi: 10.1093/pubmed/fdq009
21. Magee CG, Hult JR, Turalba R, et al. Preventive care for women in prison: a qualitative community health assessment of the Papanicolaou test and follow-up treatment at a California state women's prison. *Am J Public Health* 2005;95(10):1712-7. doi: 10.2105/ajph.2005.063677 [published Online First: 2005/09/28]
22. Awofeso N. Prisoner healthcare co-payment policy. *Applied Health Economics and Health Policy* 2005;4(3):159-64. doi: 10.2165/00148365-200504030-00004
23. Lin JT, Mathew P. Cancer Pain Management in Prisons: A Survey of Primary Care Practitioners and Inmates. *Journal of Pain and Symptom Management* 2005;29(5):466-73. doi: 10.1016/j.jpainsymman.2004.08.015
24. Binswanger IA, White MC, Pérez-Stable EJ, et al. Cancer Screening Among Jail Inmates: Frequency, Knowledge, and Willingness. *American Journal of Public Health* 2005;95(10):1781-87. doi: 10.2105/AJPH.2004.052498
25. Hadden KB, Puglisi L, Prince L, et al. Health Literacy Among a Formerly Incarcerated Population Using Data from the Transitions Clinic Network. *J Urban Health* 2018;95(4):547-55. doi: 10.1007/s11524-018-0276-0 [published Online First: 2018/06/27]
26. Wang EA, Wang Y, Krumholz HM. A high risk of hospitalization following release from correctional facilities in Medicare beneficiaries: a retrospective matched cohort study, 2002 to 2010. *JAMA Intern Med* 2013;173(17):1621-8. doi: 10.1001/jamainternmed.2013.9008 [published Online First: 2013/07/24]
27. Western B. Punishment and Inequality in America: Russell Sage Foundation 2006.
28. Rothman KJ, Greenland S, Lash TL. Modern Epidemiology: Wolters Kluwer Health/Lippincott Williams & Wilkins 2008.
29. Markman M. Care of the incarcerated cancer patient. *Current Oncology Reports* 2007;9(2):81-82.
30. Creswell JW, Plano Clark VL, Gutmann ML, et al. Advanced mixed methods research designs. In: Tashakkori A, Teddlie C, Teddlie CB, eds. Handbook of Mixed Methods in Social & Behavioral Research. Thousand Oaks, CA: SAGE Publications 2003:209–40.
31. Thomas EH, Wang EA, Curry LA, et al. Patients' experiences managing cardiovascular disease and risk factors in prison. *Health & Justice* 2016;4(1):4. doi: 10.1186/s40352-016-0035-9
32. Guzman GG. Household Income: 2019. American Community Survey Briefs. Washington DC: US Department of Commerce: US Census Bureau, 2020.
33. The Sentencing Project. The Facts: State by State Data. Washington, DC2020 [Available from: <https://www.sentencingproject.org/the-facts/#rankings>].
35. Match\*Pro Software [program]. 1.6.2 version. Rockville, MD: National Cancer Institute: Division of Cancer Control and Population Sciences: Surveillance Research Program, 2020.
36. Fellegi IP, Sunter AB. A Theory for Record Linkage. *Journal of the American Statistical Association* 1969;64(328):1183-210. doi: 10.1080/01621459.1969.10501049
37. Singer JD, Willett JB. Modeling the days of our lives: Using survival analysis when designing and analyzing longitudinal studies of duration and the timing of events. *Psychological Bulletin* 1991;110(2):268-90. doi: 10.1037/0033-2909.110.2.268

- 1
- 2
- 3 38. Agency for Healthcare Research and Quality. 2007 National Healthcare Quality Report.  
4 Rockville, MD: U.S. Department of Health and Human Services, Agency for Healthcare  
5 Research and Quality, 2008.
- 6 39. Huff L, Chang C, Thomas J, et al. Defining an acceptable period of time from melanoma  
7 biopsy to excision. *Dermatology Reports* 2012;4 doi: 10.4081/dr.2012.e2
- 8 40. Bardell T, Belliveau P, Kong W, et al. Waiting times for cancer surgery in Ontario: 1984-  
9 2000. *Clin Oncol (R Coll Radiol)* 2006;18(5):401-9. doi: 10.1016/j.clon.2006.02.012  
10 [published Online First: 2006/07/05]
- 11 41. Bilimoria K, Ko C, Tomlinson J, et al. Wait Times for Cancer Surgery in the United States.  
12 *Annals of surgery* 2011;253:779-85. doi: 10.1097/SLA.0b013e318211cc0f
- 13 42. Hanna TP, King WD, Thibodeau S, et al. Mortality due to cancer treatment delay: systematic  
14 review and meta-analysis. *BMJ* 2020;371:m4087. doi: 10.1136/bmj.m4087
- 15 43. Yang DD, Mahal BA, Muralidhar V, et al. Receipt of definitive therapy in elderly patients with  
16 unfavorable-risk prostate cancer. *Cancer* 2017;123(24):4832-40. doi:  
17 10.1002/cncr.30948 [published Online First: 2017/08/24]
- 18 44. Reisch LM, Fosse JS, Beverly K, et al. Training, Quality Assurance, and Assessment of  
19 Medical Record Abstraction in a Multisite Study. *American Journal of Epidemiology*  
20 2003;157(6):546-51. doi: 10.1093/aje/kwg016
- 21 45. Bronson J, Sufrin C. Pregnant Women in Prison and Jail Don't Count: Data Gaps on  
22 Maternal Health and Incarceration. *Public Health Rep* 2019;134(1\_suppl):57s-62s. doi:  
23 10.1177/0033354918812088 [published Online First: 2019/05/07]
- 24 46. Hsieh FY, Bloch DA, Larsen MD. A simple method of sample size calculation for linear and  
25 logistic regression. *Statistics in Medicine* 1998;17(14):1623-34. doi:  
26 [https://doi.org/10.1002/\(SICI\)1097-0258\(19980730\)17:14<1623::AID-SIM871>3.0.CO;2-](https://doi.org/10.1002/(SICI)1097-0258(19980730)17:14<1623::AID-SIM871>3.0.CO;2-S)  
27 [S](https://doi.org/10.1002/(SICI)1097-0258(19980730)17:14<1623::AID-SIM871>3.0.CO;2-S)
- 28 47. Cohen J. Statistical Power Analysis. *Current Directions in Psychological Science*  
29 1992;1(3):98-101. doi: 10.1111/1467-8721.ep10768783
- 30 48. Hsieh FY. Sample size tables for logistic regression. *Statistics in Medicine* 1989;8(7):795-  
31 802. doi: <https://doi.org/10.1002/sim.4780080704>
- 32 49. Sandelowski M. Sample size in qualitative research. *Research in Nursing & Health*  
33 1995;18(2):179-83. doi: <https://doi.org/10.1002/nur.4770180211>
- 34 50. Curry LA, O'Cathain A, Clark VLP, et al. The Role of Group Dynamics in Mixed Methods  
35 Health Sciences Research Teams. *Journal of Mixed Methods Research* 2011;6(1):5-20.  
36 doi: 10.1177/1558689811416941
- 37 51. Corbin JM, Strauss A. Grounded theory research: Procedures, canons, and evaluative  
38 criteria. *Qualitative Sociology* 1990;13(1):3-21. doi: 10.1007/BF00988593
- 39 52. Glaser BG, Strauss AL. *The Discovery of Grounded Theory: Strategies for Qualitative*  
40 *Research*. Chicago, IL: Aldine de Gruyter 1967.
- 41 53. Bradley EH, Curry LA, Devers KJ. Qualitative data analysis for health services research:  
42 developing taxonomy, themes, and theory. *Health Serv Res* 2007;42(4):1758-72. doi:  
43 10.1111/j.1475-6773.2006.00684.x [published Online First: 2007/02/09]
- 44 54. Sbaraini A, Carter SM, Evans RW, et al. How to do a grounded theory study: a worked  
45 example of a study of dental practices. *BMC Medical Research Methodology*  
46 2011;11(1):128. doi: 10.1186/1471-2288-11-128
- 47 55. Bradley CJ, Given CW, Roberts C. Race, socioeconomic status, and breast cancer  
48 treatment and survival. *J Natl Cancer Inst* 2002;94(7):490-6. doi: 10.1093/jnci/94.7.490  
49 [published Online First: 2002/04/04]
- 50 56. Newman LA, Griffith KA, Jatoi I, et al. Meta-analysis of survival in African American and  
51 white American patients with breast cancer: ethnicity compared with socioeconomic  
52 status. *J Clin Oncol* 2006;24(9):1342-9. doi: 10.1200/jco.2005.03.3472 [published Online  
53 First: 2006/03/22]
- 54
- 55
- 56
- 57
- 58
- 59
- 60

**Table 1 References**

34. Mallik-Kane K, Liberman A, Dubay L, et al. Using Jail to Enroll Low-Income Men in Medicaid. Washington DC: Urban Institute: Justice Policy Center, 2016.

**FIGURE LEGENDS****Figure 1: Models Regarding Incarceration and Cancer Disparities**

There are two potential models for the relationship between criminal justice involvement and disparities in cancer treatment and outcomes. The first (Model A; Figure 1) involves a causal link between incarceration health outcomes that is independent of race and ethnicity. That is, incarceration might adversely affect cancer care and outcomes, but the effect is similar for minority and non-minority individuals. In this setting, the fact that minority individuals are more likely to be incarcerated is the driver of worse outcomes for minority individuals. In the second model (Figure 1; Model B), race/ethnicity is an effect modifier in the relation between criminal justice involvement and cancer outcomes, and Black and Latino communities are disproportionately affected by being incarcerated relative to white communities.

**Figure 2: Incarceration and Cancer-Related Outcomes Mixed Methods Study Schema****Figure 3: Timeline of the ICRO Study**

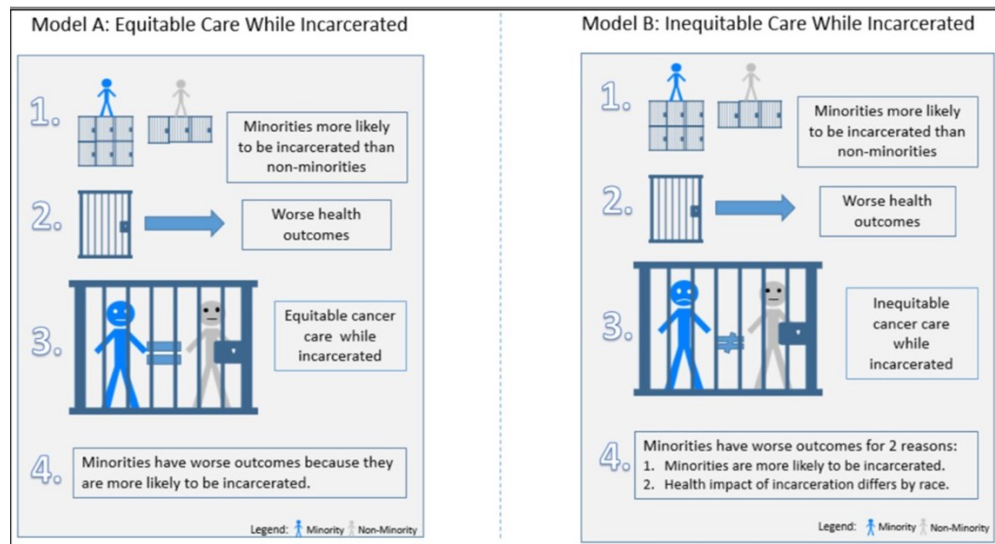

**Figure 1: Models Regarding Incarceration and Cancer Disparities** There are two potential models for the relationship between criminal justice involvement and disparities in cancer treatment and outcomes. The first (Model A; Figure 1) involves a causal link between incarceration and health outcomes that is independent of race and ethnicity. That is, incarceration might adversely affect cancer care and outcomes, but the effect is similar for minority and non-minority individuals. In this setting, the fact that minority individuals are more likely to be incarcerated is the driver of worse outcomes for minority individuals. In the second model (Figure 1; Model B), race/ethnicity is an effect modifier in the relation between criminal justice involvement and cancer outcomes, and Black and Latino communities are disproportionately affected by being incarcerated relative to white communities.

304x166mm (96 x 96 DPI)



Figure 2: Incarceration and Cancer-Related Outcomes Mixed Methods Study Schema

276x159mm (96 x 96 DPI)

| TASK                                                                                                                 | Year and Month of Grant Funding |      |        |       |        |       |        |       |
|----------------------------------------------------------------------------------------------------------------------|---------------------------------|------|--------|-------|--------|-------|--------|-------|
|                                                                                                                      | Year 1                          |      | Year 2 |       | Year 3 |       | Year 4 |       |
|                                                                                                                      | 1-6                             | 7-12 | 13-18  | 19-24 | 25-30  | 31-36 | 37-42  | 43-48 |
| <b>Study start-up</b>                                                                                                |                                 |      |        |       |        |       |        |       |
| Hire/train research staff                                                                                            | ■                               |      |        |       |        |       |        |       |
| IRB approval                                                                                                         | ■                               |      |        |       |        |       |        |       |
| <b>Aim 1: Cancer Incidence &amp; Mortality</b>                                                                       |                                 |      |        |       |        |       |        |       |
| Linkage of Department of Correction (DOC) and Connecticut Tumor Registry (CTR) Data, and Department of Public Health |                                 | ■    |        |       |        |       |        |       |
| Analysis of linked DOC and CTR data                                                                                  |                                 |      | ■      |       |        |       |        |       |
| <b>Aims 2-4: Incarceration, Cancer Care and Outcomes</b>                                                             |                                 |      |        |       |        |       |        |       |
| Assessment of cancer care using CTR data supplemented by Rapid Case Ascertainment                                    |                                 | ■    | ■      |       |        |       |        |       |
| Data entry, management & cleaning, analysis                                                                          |                                 |      | ■      | ■     | ■      |       |        |       |
| Analysis of linked data                                                                                              |                                 |      | ■      | ■     | ■      |       |        |       |
| <b>Aim 5 (Qualitative Study)</b>                                                                                     |                                 |      |        |       |        |       |        |       |
| Iterative design of Discussion Guide (built upon Aims 1-4 findings)                                                  |                                 |      |        |       | ■      |       |        |       |
| Pilot testing                                                                                                        |                                 |      |        |       |        | ■     |        |       |
| Patient interviews                                                                                                   |                                 |      |        |       |        | ■     | ■      |       |
| Data coding                                                                                                          |                                 |      |        |       |        |       | ■      | ■     |
| <b>Project Management &amp; Operations</b>                                                                           |                                 |      |        |       |        |       |        |       |
| Research team meetings                                                                                               | ■                               | ■    | ■      | ■     | ■      | ■     | ■      | ■     |
| Advisory board meetings                                                                                              | ■                               | ■    | ■      | ■     | ■      | ■     | ■      | ■     |
| Manuscript preparation & submission                                                                                  | ■                               | ■    | ■      | ■     | ■      | ■     | ■      | ■     |
| Stakeholder dissemination                                                                                            |                                 |      | ■      | ■     | ■      | ■     | ■      | ■     |

**Figure 3: Timeline of the ICRO Study**

343x249mm (144 x 144 DPI)
