# Supplementary material for: Incarceration and Cancer-Related Outcomes (ICRO) study protocol: using a mixed-methods approach to investigate the role of incarceration on cancer incidence, mortality and quality of care
Source: PubMed Central journal article supplement — BMJ Open. 2021 May 24;11(5):e048863. doi: 10.1136/bmjopen-2021-048863 (PMC8154989; doi:10.1136/bmjopen-2021-048863), 2021-05-24
Supplement: bmjopen-2021-048863.reviewer_comments.pdf [file bmjopen-2021-048863.reviewer_comments.pdf]

## PEER REVIEW HISTORY

BMJ Open publishes all reviews undertaken for accepted manuscripts. Reviewers are asked to complete a checklist review form (<http://bmjopen.bmj.com/site/about/resources/checklist.pdf>) and are provided with free text boxes to elaborate on their assessment. These free text comments are reproduced below.

## ARTICLE DETAILS

|                            |                                                                                                                                                                                                                |
|----------------------------|----------------------------------------------------------------------------------------------------------------------------------------------------------------------------------------------------------------|
| <b>TITLE (PROVISIONAL)</b> | Incarceration and Cancer-Related Outcomes (ICRO) Study Protocol: Using a Mixed Methods Approach to Investigate the Role of Incarceration on Cancer Incidence, Mortality, and Quality of Care                   |
| <b>AUTHORS</b>             | Puglisi, Lisa; Halberstam, Alexandra; Aminawung, Jenerius; Gallagher, Colleen; Gonsalves, Lou; Schulman-Green, Dena; Lin, Hsiu-ju; Metha, Rajni; Mun, Sophia; Oladeru, Oluwadamilola; Gross, Cary; Wang, Emily |

This article was not externally reviewed at BMJ Open. Protocols that have been independently assessed prior to submission to BMJ Open are usually fast-tracked to publication on the grounds that further substantial changes will not be possible. This independent assessment will usually be external, independent review for both a substantial grant award from a non-commercial or government funder and ethics approval.
